# Supplementary material
Source: HighWire-hosted journal article supplement (https://www.annfammed.org/highwire/filestream/14046/field_highwire_adjunct_files/0/Boon.pdf)
Supplement: Boon.pdf [file Boon.pdf]

## **Supplementary materials for**

Boon HA, Van den Bruel A, Struyf T, Gillemot A, Bullens D, Verbakel JY. Clinical features for the diagnosis of pediatric urinary tract infections: systematic review and meta-analysis. *Ann Fam Med.* 2021;19(5):437-446.

**Appendix 1** PRISMA checklist (p2-4)

**Appendix 2** Electronic search strategy (PubMed/MEDLINE) (p5-6)

**Appendix 3** Risk of bias and applicability assessment (p7)

**Appendix 4.** Likelihood ratios and post-test disease probabilities (%) (dumbbell plots) of clinical features for urinary tract infections (p8-12)

**Appendix 5.** Forest plots of likelihood ratios for urinary signs and symptoms (p14)

**Appendix 6.** Likelihood ratios and post-test disease probabilities (%) (dumbbell plots) of prediction rules for urinary tract infections (p15)

**Appendix 7.** Sensitivity analyses (p16-17)

**Supplemental Table 1.** Characteristics of Included Studies

**References** (p22-25)

**Supplemental Figure 1.** PRISMA flow diagram of included studies. (p26)

The supplementary material had been provided by the authors to give readers additional information about their work.

## Appendix 1. PRISMA – DTA (diagnostic test accuracy) checklist

|                                 | #  | PRISMA-DTA Checklist Item                                                                                                                                                                                                                                                | Reported on page # |
|---------------------------------|----|--------------------------------------------------------------------------------------------------------------------------------------------------------------------------------------------------------------------------------------------------------------------------|--------------------|
| <b>TITLE / ABSTRACT</b>         |    |                                                                                                                                                                                                                                                                          |                    |
| Title                           | 1  | Identify the report as a systematic review (+/- meta-analysis) of diagnostic test accuracy (DTA) studies.                                                                                                                                                                | 1                  |
| Abstract                        | 2  | Abstract: See PRISMA-DTA for abstracts.                                                                                                                                                                                                                                  | 2                  |
| <b>INTRODUCTION</b>             |    |                                                                                                                                                                                                                                                                          |                    |
| Rationale                       | 3  | Describe the rationale for the review in the context of what is already known.                                                                                                                                                                                           | 4                  |
| Clinical role of index test     | D1 | State the scientific and clinical background, including the intended use and clinical role of the index test, and if applicable, the rationale for minimally acceptable test accuracy (or minimum difference in accuracy for comparative design).                        | 4                  |
| Objectives                      | 4  | Provide an explicit statement of question(s) being addressed in terms of participants, index test(s), and target condition(s).                                                                                                                                           | 4                  |
| <b>METHODS</b>                  |    |                                                                                                                                                                                                                                                                          |                    |
| Protocol and registration       | 5  | Indicate if a review protocol exists, if and where it can be accessed (e.g., Web address), and, if available, provide registration information including registration number.                                                                                            | 5                  |
| Eligibility criteria            | 6  | Specify study characteristics (participants, setting, index test(s), reference standard(s), target condition(s), and study design) and report characteristics (e.g., years considered, language, publication status) used as criteria for eligibility, giving rationale. | 5                  |
| Information sources             | 7  | Describe all information sources (e.g., databases with dates of coverage, contact with study authors to identify additional studies) in the search and date last searched.                                                                                               | 5                  |
| Search                          | 8  | Present full search strategies for all electronic databases and other sources searched, including any limits used, such that they could be repeated.                                                                                                                     | 5                  |
| Study selection                 | 9  | State the process for selecting studies (i.e., screening, eligibility, included in systematic review, and, if applicable, included in the meta-analysis).                                                                                                                | 5-6                |
| Data collection process         | 10 | Describe method of data extraction from reports (e.g., piloted forms, independently, in duplicate) and any processes for obtaining and confirming data from investigators.                                                                                               | 5-6                |
| Definitions for data extraction | 11 | Provide definitions used in data extraction and classifications of target condition(s), index test(s), reference standard(s) and other characteristics (e.g. study design, clinical setting).                                                                            | 5-6                |
| Risk of bias and applicability  | 12 | Describe methods used for assessing risk of bias in individual studies and concerns regarding the applicability to the review question.                                                                                                                                  | 6                  |

| <b>METHODS</b>               |    |                                                                                                                                                                                                                                                                                                                                                                                                                                          |     |
|------------------------------|----|------------------------------------------------------------------------------------------------------------------------------------------------------------------------------------------------------------------------------------------------------------------------------------------------------------------------------------------------------------------------------------------------------------------------------------------|-----|
| Diagnostic accuracy measures | 13 | State the principal diagnostic accuracy measure(s) reported (e.g. sensitivity, specificity) and state the unit of assessment (e.g. per-patient, per-lesion).                                                                                                                                                                                                                                                                             | 6   |
| Synthesis of results         | 14 | Describe methods of handling data, combining results of studies and describing variability between studies. This could include, but is not limited to: a) handling of multiple definitions of target condition. b) handling of multiple thresholds of test positivity, c) handling multiple index test readers, d) handling of indeterminate test results, e) grouping and comparing tests, f) handling of different reference standards | 6-7 |

| <b>Section/topic</b>           | <b>#</b> | <b>PRISMA-DTA Checklist Item</b>                                                                                                                                                                                                                                                                  | <b>Reported on page #</b> |
|--------------------------------|----------|---------------------------------------------------------------------------------------------------------------------------------------------------------------------------------------------------------------------------------------------------------------------------------------------------|---------------------------|
| Meta-analysis                  | D2       | Report the statistical methods used for meta-analyses, if performed.                                                                                                                                                                                                                              | 6-7                       |
| Additional analyses            | 16       | Describe methods of additional analyses (e.g., sensitivity or subgroup analyses, meta-regression), if done, indicating which were pre-specified.                                                                                                                                                  | 7                         |
| <b>RESULTS</b>                 |          |                                                                                                                                                                                                                                                                                                   |                           |
| Study selection                | 17       | Provide numbers of studies screened, assessed for eligibility, included in the review (and included in meta-analysis, if applicable) with reasons for exclusions at each stage, ideally with a flow diagram.                                                                                      | 7                         |
| Study characteristics          | 18       | For each included study provide citations and present key characteristics including: a) participant characteristics (presentation, prior testing), b) clinical setting, c) study design, d) target condition definition, e) index test, f) reference standard, g) sample size, h) funding sources | 7-8                       |
| Risk of bias and applicability | 19       | Present evaluation of risk of bias and concerns regarding applicability for each study.                                                                                                                                                                                                           | 8                         |
| Results of individual studies  | 20       | For each analysis in each study (e.g. unique combination of index test, reference standard, and positivity threshold) report 2x2 data (TP, FP, FN, TN) with estimates of diagnostic accuracy and confidence intervals, ideally with a forest or receiver operator characteristic (ROC) plot.      | 8-10                      |
| Synthesis of results           | 21       | Describe test accuracy, including variability; if meta-analysis was done, include results and confidence intervals.                                                                                                                                                                               | 8-10                      |
| Additional analysis            | 23       | Give results of additional analyses, if done (e.g., sensitivity or subgroup analyses, meta-regression; analysis of index test: failure rates, proportion of inconclusive results, adverse events).                                                                                                | 10                        |

| <b>DISCUSSION</b>   |    |                                                                                                                                                                                                               |       |
|---------------------|----|---------------------------------------------------------------------------------------------------------------------------------------------------------------------------------------------------------------|-------|
| Summary of evidence | 24 | Summarize the main findings including the strength of evidence.                                                                                                                                               | 10-11 |
| Limitations         | 25 | Discuss limitations from included studies (e.g. risk of bias and concerns regarding applicability) and from the review process (e.g. incomplete retrieval of identified research).                            | 11    |
| Conclusions         | 26 | Provide a general interpretation of the results in the context of other evidence. Discuss implications for future research and clinical practice (e.g. the intended use and clinical role of the index test). | 12-13 |
| <b>FUNDING</b>      |    |                                                                                                                                                                                                               |       |
| Funding             | 27 | For the systematic review, describe the sources of funding and other support and the role of the funders.                                                                                                     | 13    |

*Adapted From:* McInnes MDF, Moher D, Thoms BD, McGrath TA, Bossuyt PM, The PRISMA-DTA Group (2018). Preferred Reporting Items for a Systematic Review and Meta-analysis of Diagnostic Test Accuracy Studies: The PRISMA-DTA Statement. JAMA. 2018 Jan 23;319(4):388-396. doi: 10.1001/jama.2017.19163. For more information, visit: [www.prisma-statement.org](http://www.prisma-statement.org).

## Appendix 2. Electronic search strategy (PubMed/MEDLINE)

### Concept 1: Urinary tract infections (bladder, kidney)

"Urinary Tract Infections"[Mesh] OR "Infection/urine"[Mesh] OR "cystitis"[Mesh] OR "pyelitis"[Mesh] OR "Pyonephrosis"[Mesh] OR "Pyelonephritis"[Mesh] OR "Urethritis"[Mesh] OR urinary-tract-infection\*[tiab] OR UTI[tiab] OR ((infection\*[tiab] OR inflam\*[tiab]) AND (bladder[tiab] OR kidney[tiab] OR "urinary tract"[tiab])) OR bacteriuria\*[tiab] OR pyuria\*[tiab] OR bladder-infection\*[tiab] OR "bladder inflammation"[tiab] OR cystitis[tiab] OR cystitides[tiab] OR urethritis[tiab] OR pyelocystitis[tiab] OR cystopyelitis[tiab] OR kidney-infection\*[tiab] OR pyelitis[tiab] OR pyelonephritis[tiab] OR pyelonephritides[tiab] OR urosepsis[tiab] OR pyonephrosis[tiab]

### Concept 2: Signs and symptoms, diagnostic tests, clinical prediction rules

"Signs and Symptoms"[Mesh] OR "Diagnostic Techniques and Procedures"[Mesh] OR "Diagnosis"[Mesh:NoExp] OR "Clinical Decision-Making"[Mesh] OR "Decision Support Techniques"[Mesh] OR "Decision Trees"[Mesh] OR "diagnosis"[Subheading] OR "Reagent Kits, Diagnostic"[Mesh] OR "Point-of-Care Systems"[Mesh] OR "Biomarkers"[Mesh] OR "C-Reactive Protein"[Mesh] OR "Lactic Acid"[Mesh] OR "Procalcitonin"[Mesh] OR "Nitrates/urine"[Mesh] OR "leukocyte esterase" [Supplementary Concept] OR "Peroxidase/urine"[Mesh] OR "Lactoferrin/urine"[Mesh] OR "Immunoglobulin A, Secretory/urine"[Mesh] OR diagnos\*[tiab] OR sign[tiab] OR signs[tiab] OR symptom\*[tiab] OR clinical-feature\*[tiab] OR clinical-assessment[tiab] OR anamnesis[tiab] OR "medical history"[tiab] OR symptom-evaluation\*[tiab] OR symptom-assessment\*[tiab] OR physical-examination\*[tiab] OR clinical-examination\*[tiab] OR clinical-impression\*[tiab] OR intuition[tiab] OR "gut feeling"[tiab] OR prediction-rule\*[tiab] OR decision-tree\*[tiab] OR decision-support-techni\*[tiab] OR decision-model\*[tiab] OR decision-support-model\*[tiab] OR appgar-score\*[tiab] OR visual-analogue-scale\*[tiab] OR "generally unwell"[tiab] OR lethargy[tiab] OR consciousness[tiab] OR confusion[tiab] OR disorientation[tiab] OR convulsion\*[tiab] OR irritability[tiab] OR edema[tiab] OR deshydration[tiab] OR jaundice[tiab] OR pallor[tiab] OR sleepiness[tiab] OR capillary-refill-time\*[tiab] OR vital-sign\*[tiab] OR parameter\*[tiab] OR saturation\*[tiab] OR heart-rate\*[tiab] OR pulse\*[tiab] OR blood-pressure\*[tiab] OR body-temperature\*[tiab] OR fever[tiab] OR pyrexia[tiab] OR shivering[tiab] OR chills[tiab] OR hypotherm\*[tiab] OR respiratory-rate\*[tiab] OR dyspnea[tiab] OR hypoxia[tiab] OR tachypnea[tiab] OR cyanosis[tiab] OR "failure to thrive"[tiab] OR failure-to-thrive[tiab] OR weight[tiab] OR feeding[tiab] OR "fluid intake"[tiab] OR constipation[tiab] OR diarrhea[tiab] OR nausea[tiab] OR vomiting[tiab] OR "urine appearance"[tiab] OR oliguria[tiab] OR polyuria[tiab] OR dysuria[tiab] OR mictalgia[tiab] OR "malodorous urine"[tiab] OR "cloudy urine"[tiab] OR "smelly urine"[tiab] OR incontinence[tiab] OR stranguria[tiab] OR frequency[tiab] OR urgency[tiab] OR haematuria[tiab] OR hematuria[tiab] OR "flank pain"[tiab] OR "back pain"[tiab] OR "suprapubic pain"[tiab] OR "suprapubic discomfort"[tiab] OR "abdominal pain"[tiab] OR "abdominal tenderness"[tiab] OR "costovertebral angle pain"[tiab] OR "costovertebral angle tenderness"[tiab] OR palpation[tiab] OR "painful kidney"[tiab] OR "palpable kidney"[tiab] OR percussion[tiab] OR uncircumcis\*[tiab] OR "dysplastic kidney"[tiab] OR "Vesico-Ureteral Reflux"[tiab] OR laboratory-technique\*[tiab] OR laboratory-test\*[tiab] OR lab-test\*[tiab] OR hematology-test\*[tiab] OR hematological-test\*[tiab] OR hematologic-test\*[tiab] OR blood-test\*[tiab] OR blood-gas\*[tiab] OR point-of-care-test\*[tiab] OR point-of-care-system\*[tiab] OR POC-test\*[tiab] OR POCT[tiab] OR near-patient-test\*[tiab] OR rapid-test\*[tiab] OR point-of-care-techn\*[tiab] OR bedside-test\*[tiab] OR biomarker\*[tiab] OR marker\*[tiab] OR biochemical-marker\*[tiab] OR immunologic-test\*[tiab] OR immunological-test\*[tiab] OR "CRP"[tiab] OR "c reactive protein"[tiab] OR "c-reactive protein"[tiab] OR procalcitonin[tiab] OR nitrate[tiab] OR leucocyte[tiab] OR "erythrocyte sedimentation"[tiab] OR "glomerular filtration"[tiab] OR GFR[tiab] OR urea[tiab] OR lactoferrin[tiab] OR antimicrobial-peptide\*[tiab] OR myeloperoxidase[tiab] OR interleukin\*[tiab] OR "xanthine oxidase"[tiab] OR heparin-binding-protein\*[tiab] OR "secretory IgA"[tiab] OR proteinase-inhibitor\*[tiab] OR electrolyte\*[tiab] OR "full blood count"[tiab] OR FBC[tiab] OR "lactic acid"[tiab] OR LDH[tiab] OR lactate[tiab] OR urine-test\*[tiab] OR urinalysis[tiab] OR cytology[tiab] OR kidney-function-test\*[tiab] OR urine-culture\*[tiab] OR reagent-strip\*[tiab] OR dipstick[tiab] OR test-strip\*[tiab]

### Concept 3: Children 0-18y

"Child"[Mesh] OR "Adolescent"[Mesh] OR "Infant"[Mesh] OR "Minors"[Mesh] OR baby[tiab] OR babies[tiab] OR newborn\*[tiab] OR neonat\*[tiab] OR perinatal\*[tiab] OR postnatal\*[tiab] OR post-

natal\*[tiab] OR premature\*[tiab] OR preterm\*[tiab] OR pre-term\*[tiab] OR child\*[tiab] OR schoolchild\*[tiab] OR pediatric\*[tiab] OR paediatric\*[tiab] OR toddler\*[tiab] OR infant\*[tiab] OR infancy[tiab] OR preteen\*[tiab] OR pre-teen\*[tiab] OR prepubertal\*[tiab] OR prepubescent\*[tiab] OR pubescent\*[tiab] OR puberty[tiab] OR preschool\*[tiab] OR pre-school\*[tiab] OR boy\*[tiab] OR girl\*[tiab] OR minor\*[tiab] OR kid[tiab] OR kids[tiab] OR offspring[tiab] OR adolescen\*[tiab] OR teens[tiab] OR teenager\*[tiab] OR youth\*[tiab] OR student\*[tiab] OR underage\*[tiab] OR juvenile\*[tiab] OR junior\*[tiab] OR puerile\*[tiab] OR young\*[tiab] OR "day old"[tiab] OR "days old"[tiab] OR "month old"[tiab] OR "months old"[tiab] OR "age 1"[tiab] OR "age one"[tiab] OR "ages 1"[tiab] OR "ages one" OR 1-year-old\*[tiab] OR one-year-old\*[tiab] OR "1 year of age"[tiab] OR "age 2"[tiab] OR "age two"[tiab] OR "ages 2"[tiab] OR "ages two"[tiab] OR 2-year-old\*[tiab] OR 2-years-old\*[tiab] OR two-year-old\*[tiab] OR two-years-old\*[tiab] OR "2 years of age"[tiab] OR "age 3"[tiab] OR "age three"[tiab] OR "ages 3"[tiab] OR "ages three"[tiab] OR 3-year-old\*[tiab] OR three-year-old\*[tiab] OR 3-years-old\*[tiab] OR three-years-old\*[tiab] OR "3 years of age"[tiab] OR "age 4"[tiab] OR "age four"[tiab] OR "ages 4"[tiab] OR "ages four"[tiab] OR 4-year-old\*[tiab] OR four-year-old\*[tiab] OR 4-years-old\*[tiab] OR four-years-old\*[tiab] OR "4 years of age"[tiab] OR "age 5"[tiab] OR "age five"[tiab] OR "ages 5"[tiab] OR "ages five"[tiab] OR 5-year-old\*[tiab] OR five-year-old\*[tiab] OR 5-years-old\*[tiab] OR five-years-old\*[tiab] OR "5 years of age"[tiab] OR "age 6"[tiab] OR "age six"[tiab] OR "ages 6"[tiab] OR "ages six"[tiab] OR 6-year-old\*[tiab] OR six-year-old\*[tiab] OR 6-years-old\*[tiab] OR six-years-old\*[tiab] OR "6 years of age"[tiab] OR "age 7"[tiab] OR "age seven"[tiab] OR "ages 7"[tiab] OR "ages seven"[tiab] OR 7-year-old\*[tiab] OR seven-year-old\*[tiab] OR 7-years-old\*[tiab] OR seven-years-old\*[tiab] OR "7 years of age"[tiab] OR "age 8"[tiab] OR "age eight"[tiab] OR "ages 8"[tiab] OR "ages eight"[tiab] OR 8-year-old\*[tiab] OR eight-year-old\*[tiab] OR 8-years-old\*[tiab] OR eight-years-old\*[tiab] OR "8 years of age"[tiab] OR "age 9"[tiab] OR "age nine"[tiab] OR "ages 9"[tiab] OR "ages nine"[tiab] OR 9-year-old\*[tiab] OR nine-year-old\*[tiab] OR 9-years-old\*[tiab] OR nine-years-old\*[tiab] OR "9 years of age"[tiab] OR "age 10"[tiab] OR "age ten"[tiab] OR "ages 10"[tiab] OR "ages ten"[tiab] OR 10-year-old\*[tiab] OR ten-year-old\*[tiab] OR 10-years-old\*[tiab] OR ten-years-old\*[tiab] OR "10 years of age"[tiab] OR "age 12"[tiab] OR "age twelve"[tiab] OR "ages 12"[tiab] OR "ages twelve"[tiab] OR 12-year-old\*[tiab] OR twelve-year-old\*[tiab] OR 12-years-old\*[tiab] OR twelve-years-old\*[tiab] OR "12 years of age"[tiab] OR "age 14"[tiab] OR "age fourteen"[tiab] OR "ages 14"[tiab] OR "ages fourteen"[tiab] OR 14-year-old\*[tiab] OR fourteen-year-old\*[tiab] OR 14-years-old\*[tiab] OR fourteen-years-old\*[tiab] OR "14 years of age"[tiab]

#### **Concept 4: Outpatients, ambulatory care**

"Ambulatory Care"[Mesh] OR "Ambulatory Care Facilities"[Mesh] OR "Office Visits"[Mesh] OR "Outpatient Clinics, Hospital"[Mesh] OR "General Practice"[Mesh] OR "Family Practice"[Mesh] OR "General Practitioners"[Mesh] OR "Physicians, Primary Care"[Mesh] OR "Physicians, Family"[Mesh] OR "Primary Health Care"[Mesh] OR "Emergency Medical Services"[Mesh] OR "Emergency Service, Hospital"[Mesh] OR "After-Hours Care"[Mesh] OR ambulatory[tiab] OR outpatient\*[tiab] OR "primary health care"[tiab] OR "primary care"[tiab] OR "primary healthcare"[tiab] OR "prehospital care"[tiab] OR "after-hours"[tiab] OR "out-of-hours"[tiab] OR office-visit\*[tiab] OR clinic-visit\*[tiab] OR house-visit\*[tiab] OR home-visit\*[tiab] OR emergency-medical-service\*[tiab] OR "emergency care"[tiab] OR "emergency healthcare"[tiab] OR emergency-service\*[tiab] OR "urgent care"[tiab] OR "accident and emergency"[tiab] OR emergency-department\*[tiab] OR emergency-unit\*[tiab] OR emergency-ward\*[tiab] OR health-center\*[tiab] OR health-centre\*[tiab] OR "polyclinic"[tiab] OR community-health-service\*[tiab] OR "community health care"[tiab] OR "community healthcare"[tiab] OR community-health-facilit\*[tiab] OR community-health-clinic\*[tiab] OR walk-in-center\*[tiab] OR walk-in-centre\*[tiab] OR walk-in-clinic\*[tiab] OR gp[tiab] OR general-practi\*[tiab] OR general-physician\*[tiab] OR general-doctor\*[tiab] OR family-practi\*[tiab] OR family-doctor\*[tiab] OR family-physician\*[tiab] OR emergency-doctor\*[tiab] OR emergency-physician\*[tiab] OR emergency-practitioner\*[tiab]

### Appendix 3. Risk of bias and applicability concerns summary

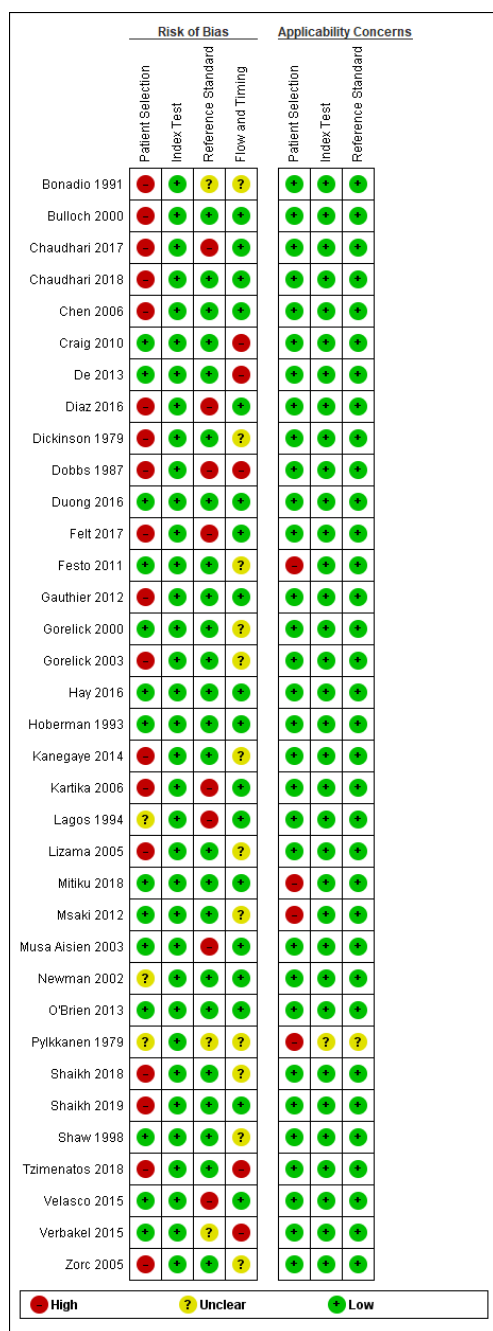

Review authors' judgements about each domain for each included study

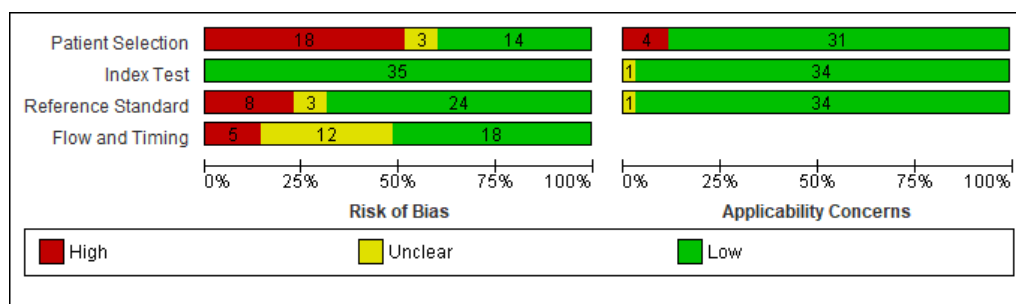

Review authors' judgements about each domain presented as percentages across included studies

## Appendix 4. Likelihood ratios and post-test disease probabilities (%) (dumbbell plots) of clinical features for urinary tract infections

### (a) Abdominal features

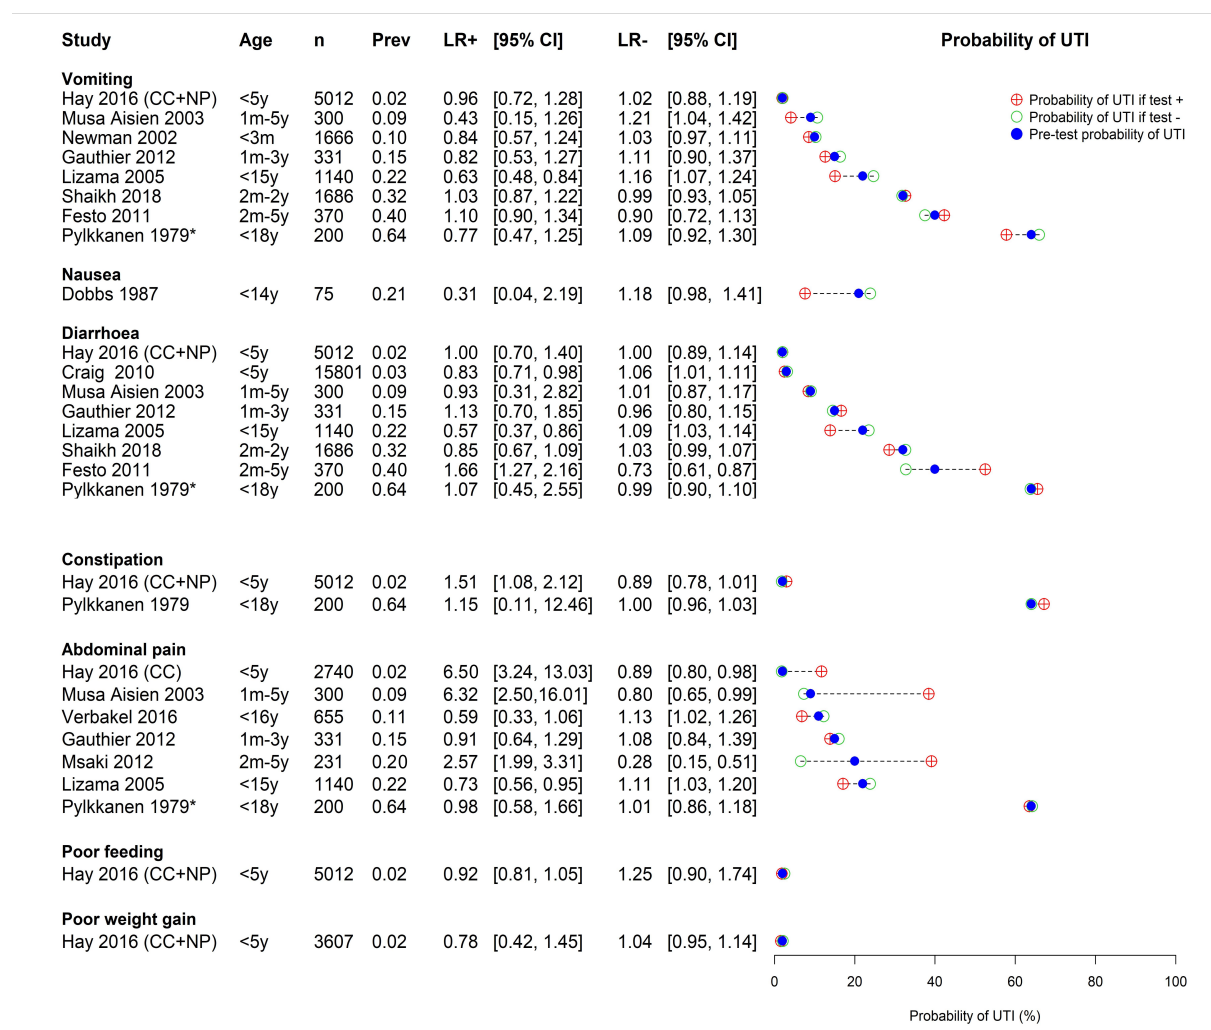

n=sample size; prev=prevalence; 95%CI=95% Confidence Interval; LR+ = positive likelihood ratio; LR- =negative likelihood ratio; NP=nappy pad samples; CC=clean catch samples; \*Data from Pylkkanen et al. (1979) were not included in the meta-analysis



(b) Ethnicity, race and gender for UTI

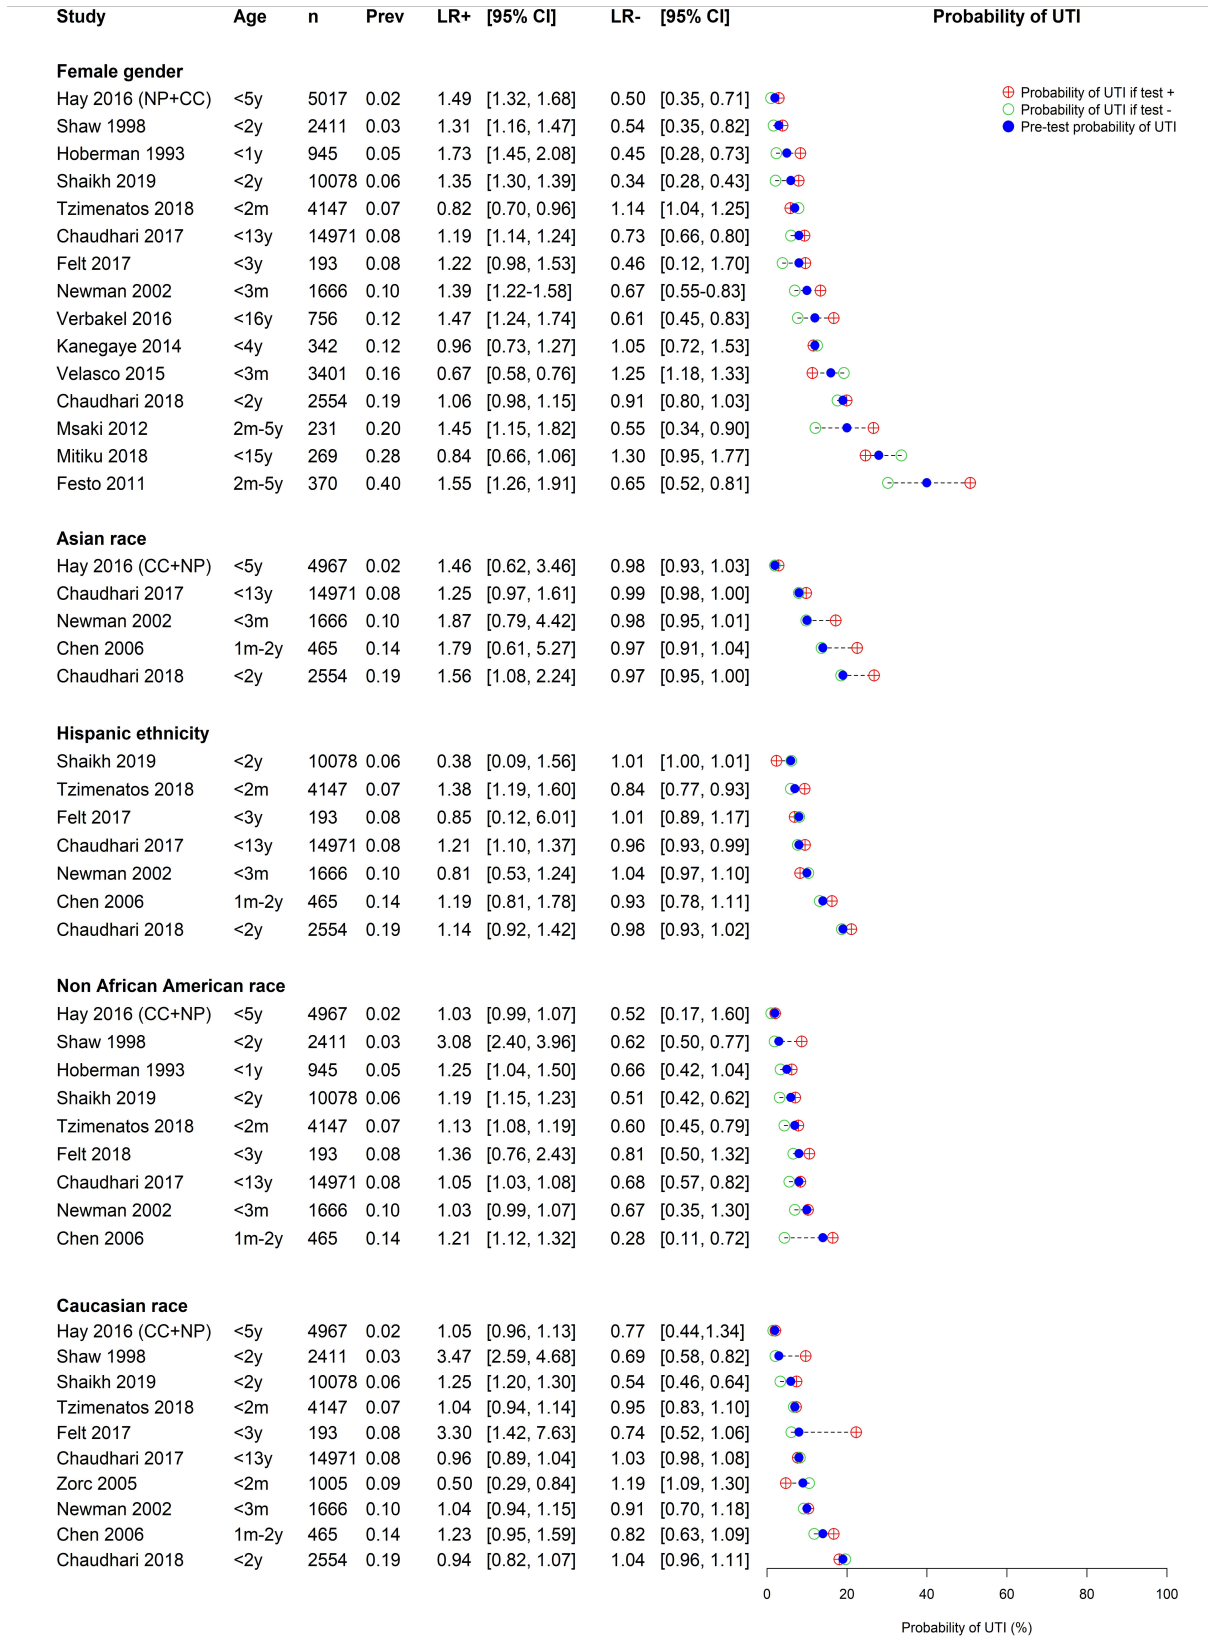

n=sample size, prev=prevalence, 95%CI=95% Confidence Interval; LR+ = positive likelihood ratio, LR - =negative likelihood ratio, NP=nappy pad samples, CC=clean catch samples

(c) Absence of signs

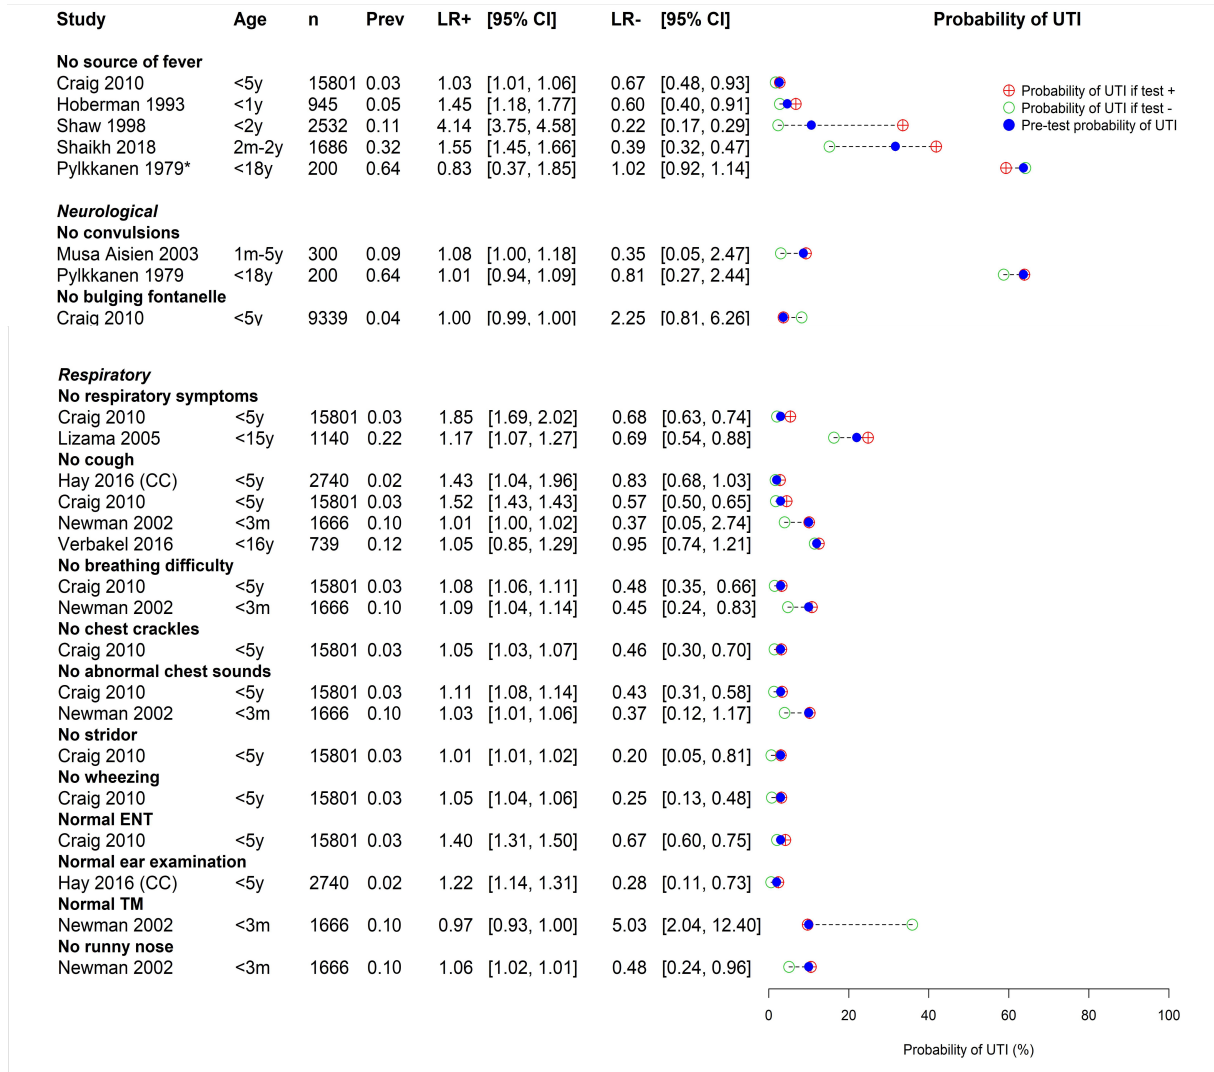

n=sample size; prev=prevalence; 95%CI=95% Confidence Interval; LR+ = positive likelihood ratio; LR- =negative likelihood ratio; NP=nappy pad samples; CC=clean catch samples; \*Data from Pylkkanen et al. (1979) were not included in the meta-analysis

(d) Medical history

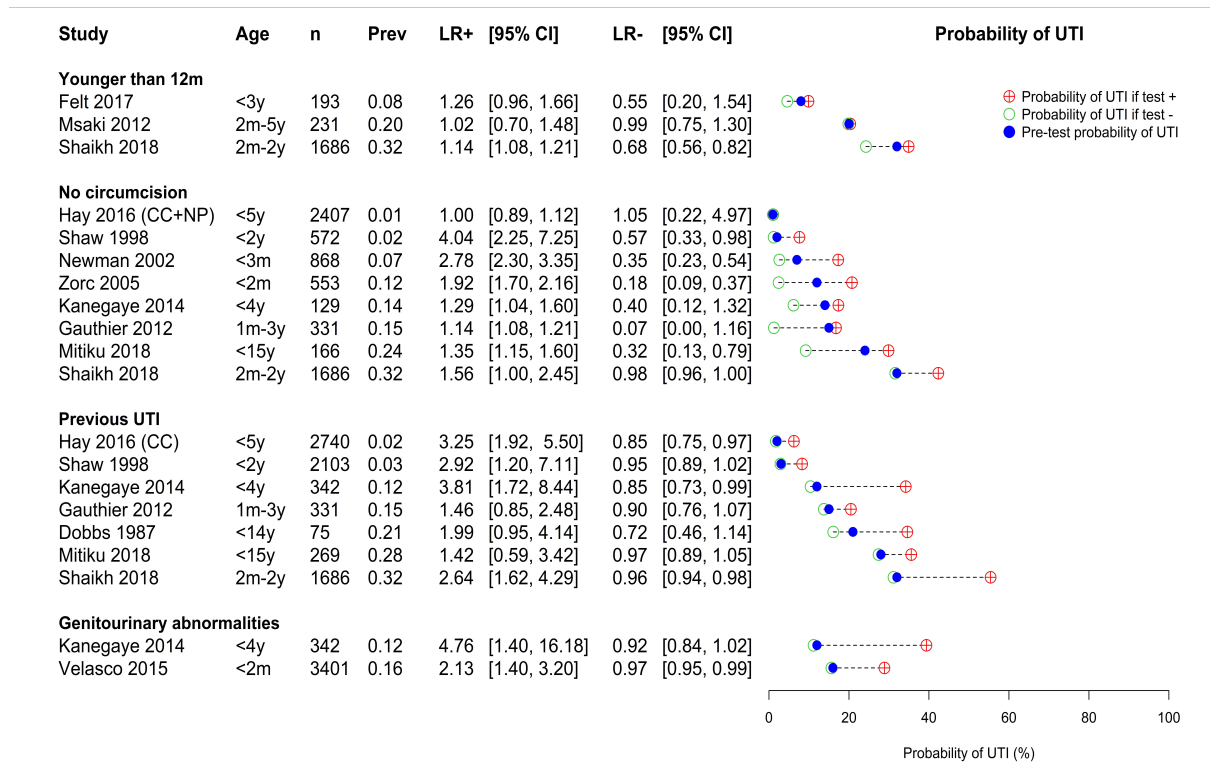

n=sample size, prev=prevalence, 95%CI=95% Confidence Interval; LR+ = positive likelihood ratio, LR - =negative likelihood ratio, NP=nappy pad samples, CC=clean catch samples

(e) General appearance

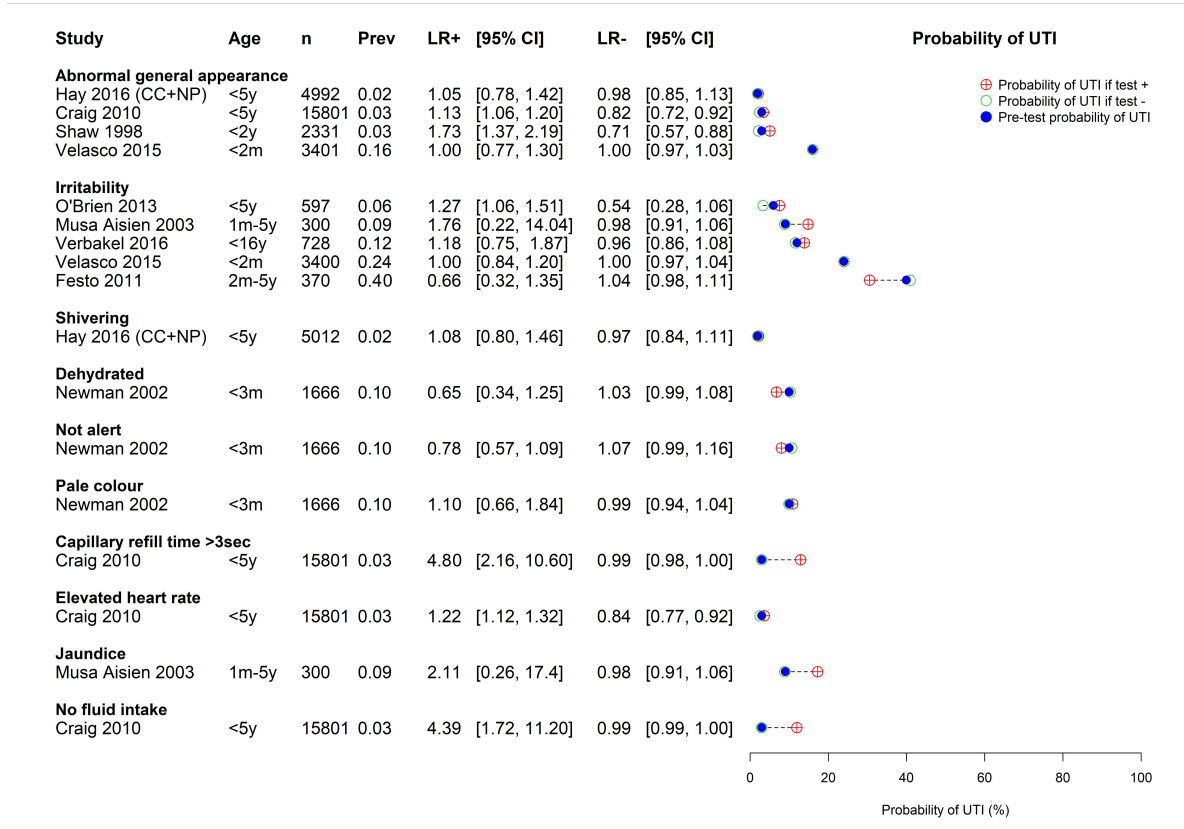

n=sample size, prev=prevalence, 95%CI=95% Confidence Interval; LR+ = positive likelihood ratio, LR - =negative likelihood ratio, NP=nappy pad samples, CC=clean catch samples

(f) Fever duration

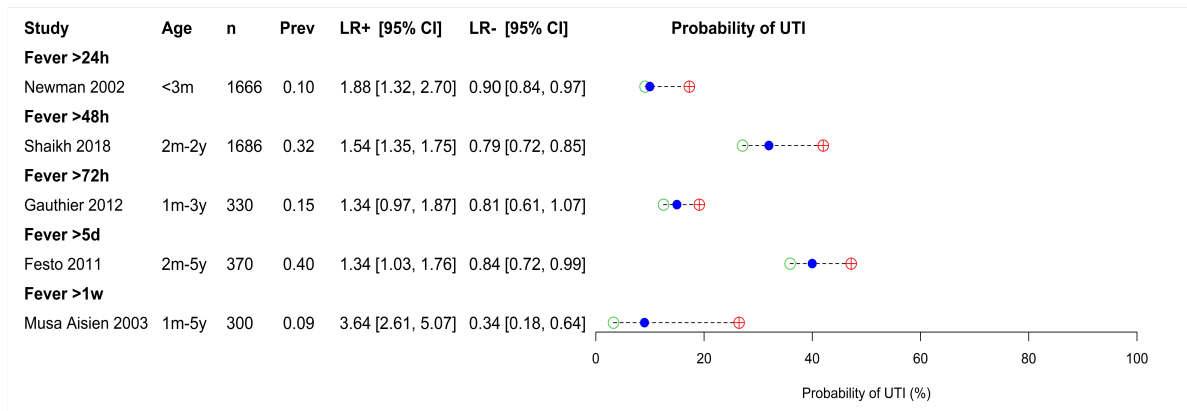

n=sample size, prev=prevalence, 95%CI=95% Confidence Interval; LR+ = positive likelihood ratio, LR - =negative likelihood ratio, NP=nappy pad samples, CC=clean catch samples

## Appendix 5. Forest plots of likelihood ratios for urinary signs and symptoms

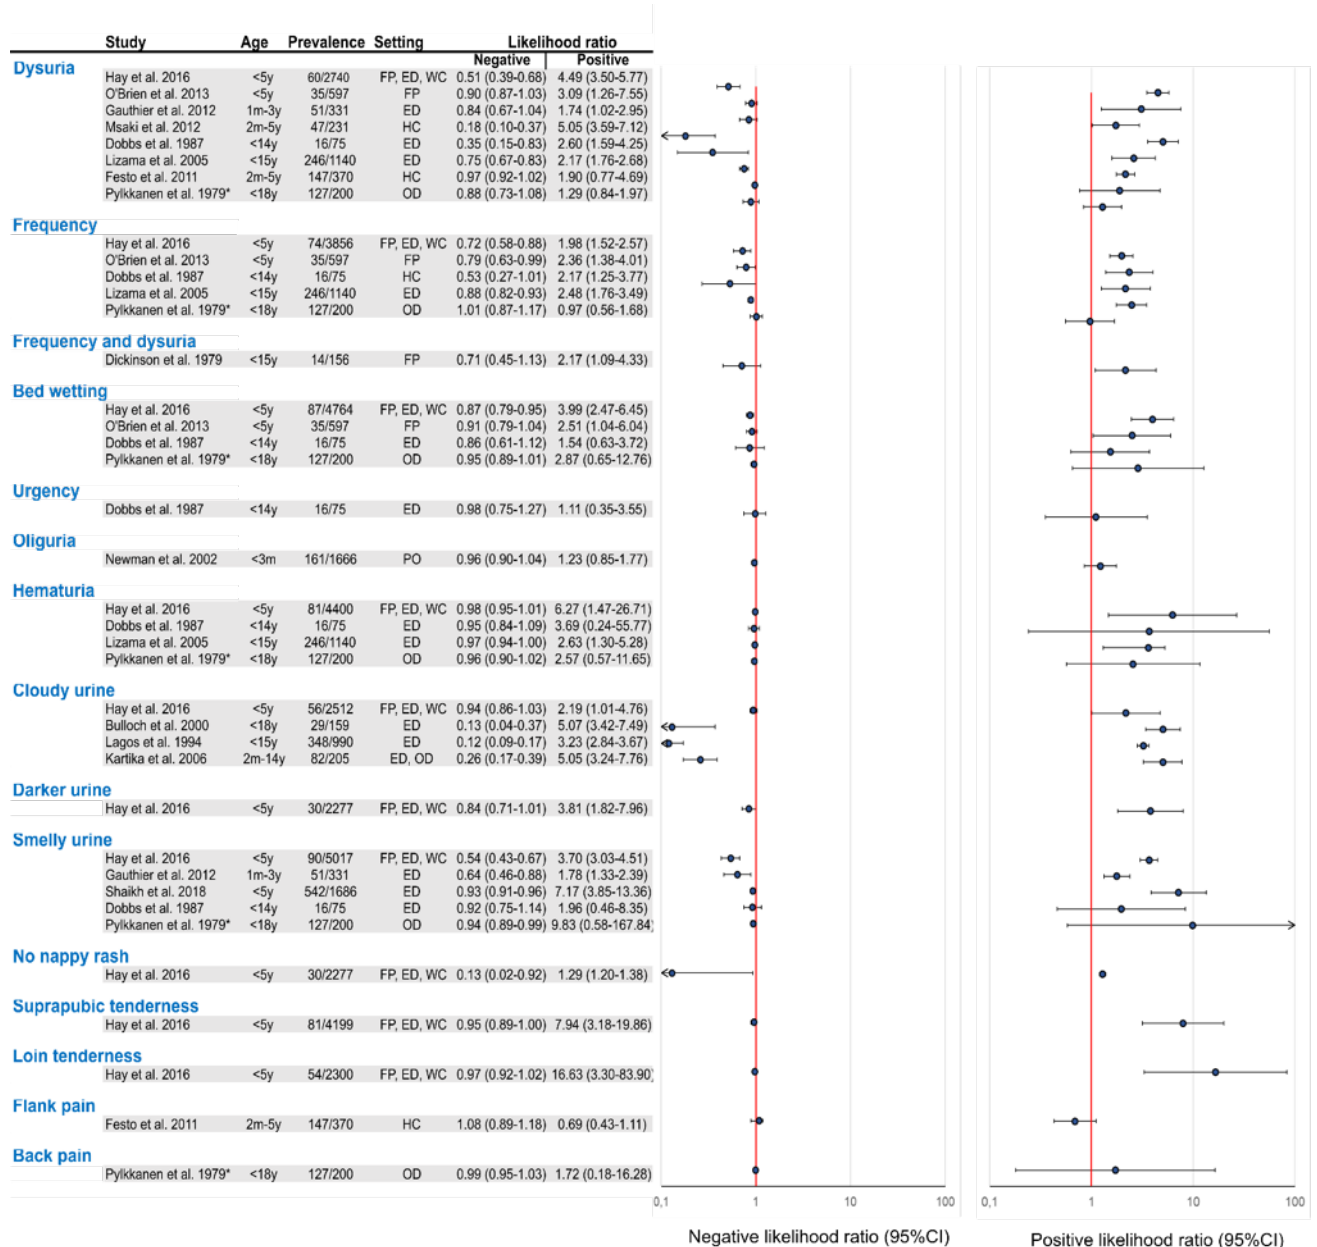

ED= emergency department, FP= family practice, WC= walk-in clinic, HC: health center, OD= outpatient department of a hospital, PO= pediatricians' office, \*Data from Pylikkanen et al (1979) were not included in the meta-analyses

## Appendix 6. Likelihood ratios and pre- and post-test disease probabilities (%) (dumbbell plots) of combinations of signs and symptoms for urinary tract infections

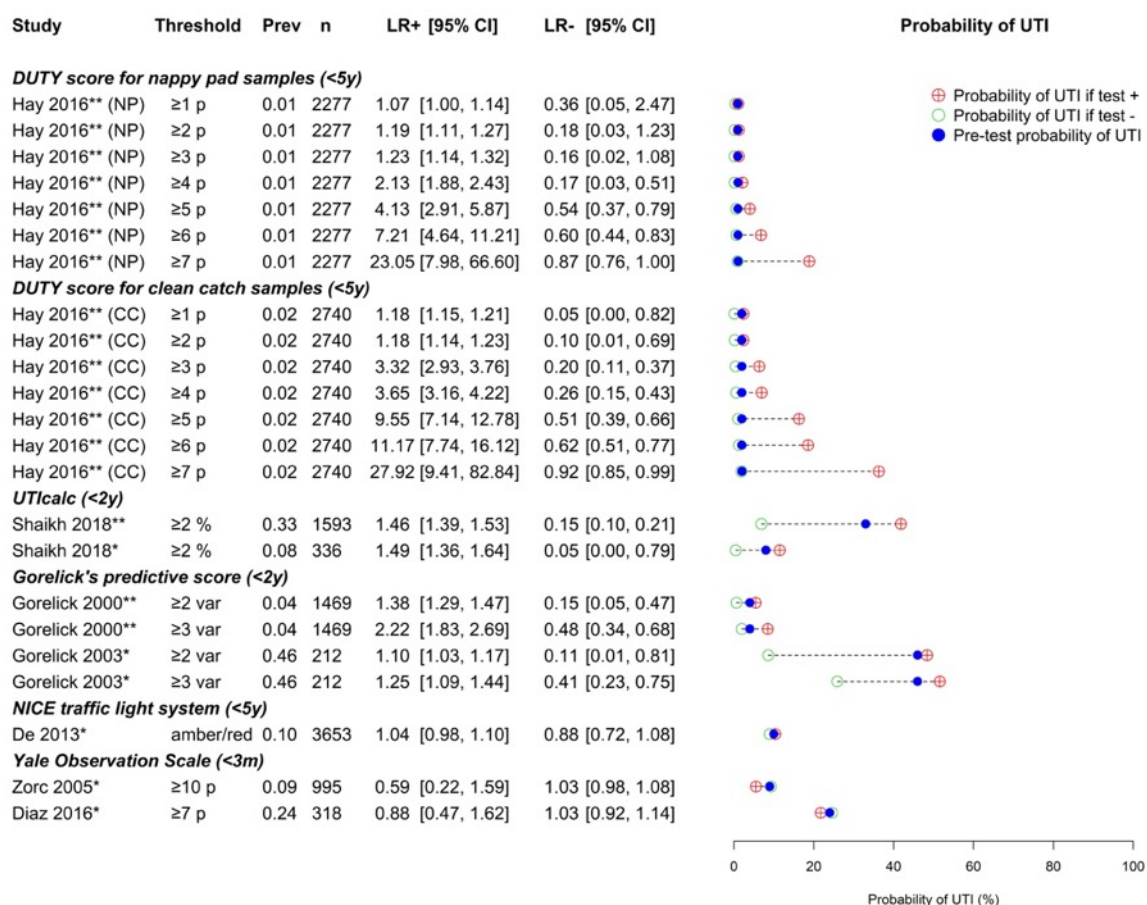

UTI= urinary tract infection; n= sample size; prev=prevalence; 95%CI: 95% Confidence Interval; LR+= positive likelihood ratio; LR-=negative likelihood ratio; NP= nappy pad; CC=clean catch; \*=validation study; \*\*=derivation study; YOS=Yale Observation Scale; NICE=National Institute for Health and Care Excellence; y=year; m=month

## Appendix 7. Sensitivity analyses (summary estimates)

| Clinical feature                                                                  | No. studies * | n      | Summary sensitivity (95% CI) | Summary specificity (95% CI) | Summary LR+ (95% CI) | Summary LR- (95% CI) |
|-----------------------------------------------------------------------------------|---------------|--------|------------------------------|------------------------------|----------------------|----------------------|
| <b>Red flags (LR+ <math>\geq</math>4) or features (LR- <math>\leq</math>0.25)</b> |               |        |                              |                              |                      |                      |
| Cloudy urine                                                                      | 4             | 3866   | 69% (30%-92%)                | 85% (72%-92%)                | 4.55 (3.73-5.56)     | 0.36 (0.13-1.02)     |
| RS                                                                                | 3 (-1)        | 3661   | 67% (17-95%)                 | 85% (68-94%)                 | 4.47 (3.69-5.42)     | 0.40 (0.11-1.50)     |
| Smelly urine                                                                      | 4             | 7109   | 31% (12%-59%)                | 93% (75%-98%)                | 4.13 (2.27-7.49)     | 0.75 (0.58-0.98)     |
| ED only                                                                           | 3 (-1)        | 2092   | 23% (8-52%)                  | 86% (86-99%)                 | 5.47 (3.59-8.33)     | 0.81 (0.63-1.03)     |
| Age <5y                                                                           | 3 (-1)        | 7034   | 43% (22-68%)                 | 85% (69-94%)                 | 2.90 (1.61-5.22)     | 0.67 (0.47-0.95)     |
| RS                                                                                | 3 (-1)        | 7034   | 43% (22-68%)                 | 85% (69-94%)                 | 2.90 (1.61-5.22)     | 0.67 (0.47-0.95)     |
| No circumcision                                                                   | 8             | 6712   | 88% (52%-98%)                | 52% (23%-80%)                | 1.81 (1.15-2.87)     | 0.24 (0.08-0.72)     |
| ED only                                                                           | 5 (-3)        | 3271   | 88% (22-100%)                | 59% (16-91%)                 | 2.12 (0.96-4.70)     | 0.21 (0.03-1.60)     |
| UTI symptoms                                                                      | 6 (-2)        | 5291   | 80% (32-97%)                 | 63% (29-87%)                 | 2.13 (1.29-3.51)     | 0.33 (0.10-1.06)     |
| Age <5y                                                                           | 7 (-1)        | 6546   | 89% (46%-99%)                | 54% (22%-84%)                | 1.95 (1.12-3.39)     | 0.20 (0.05-0.79)     |
| <b>Amber signs: LR+ <math>\geq</math>2 or LR- <math>\leq</math>0.5</b>            |               |        |                              |                              |                      |                      |
| Dysuria                                                                           | 7             | 5413   | 40% (19%-66%)                | 88% (80%-93%)                | 3.28 (2.22-4.86)     | 0.68 (0.47-1.00)     |
| ED only                                                                           | 3 (-5)        | 1475   | 29% (8-68%)                  | 86% (67-95%)                 | 2.13 (1.40-3.24)     | 0.82 (0.59-1.15)     |
| other settings only                                                               | 3 (-5)        | 1198   | 34% (17-56%)                 | 90% (81-95%)                 | 3.27 (2.07-5.18)     | 0.74 (0.57-0.96)     |
| UTI symptoms                                                                      | 4 (-4)        | 4215   | 47% (13-83%)                 | 86% (73-94%)                 | 3.34 (1.90-5.88)     | 0.62 (0.30-1.27)     |
| No UTI symptoms                                                                   | 3 (-5)        | 1198   | 34% (17-56%)                 | 90% (81-95%)                 | 3.27 (2.07-5.18)     | 0.74 (0.57-0.96)     |
| Age <5y                                                                           | 5 (-2)        | 4198   | 34% (12%-67%)                | 91% (84%-95%)                | 3.59 (2.06-6.26)     | 0.73 (0.48-1.11)     |
| RS                                                                                | 6 (-1)        | 5338   | 49% (27-72%)                 | 86% (78-91%)                 | 3.40 (2.32-4.97)     | 0.59 (0.38-0.91)     |
| Frequency                                                                         | 4             | 5668   | 36% (22%-53%)                | 84% (74%-90%)                | 2.21 (1.78-2.75)     | 0.76 (0.65-0.90)     |
| UTI symptoms                                                                      | 3 (-1)        | 5071   | 35% (17-59%)                 | 86% (74-93%)                 | 2.45 (1.77-3.41)     | 0.76 (0.59-0.97)     |
| RS                                                                                | 3 (-1)        | 5593   | 44% (30-59%)                 | 79% (71-86%)                 | 2.11 (1.68-2.67)     | 0.71 (0.58-0.87)     |
| Previous UTI                                                                      | 7             | 7546   | 15% (9%-24%)                 | 94% (88%-97%)                | 2.31 (1.73-3.10)     | 0.91 (0.86-0.96)     |
| ED only                                                                           | 4 (-3)        | 4462   | 14% (8-23%)                  | 94% (88-97%)                 | 2.25 (1.46-3.48)     | 0.92 (0.87-0.97)     |
| Age <5y                                                                           | 5 (-2)        | 7202   | 13% (7%-21%)                 | 95% (90%-97%)                | 2.51 (1.82-3.47)     | 0.92 (0.87-0.97)     |
| RS                                                                                | 6 (-1)        | 7471   | 18% (11-28%)                 | 93 (86-96%)                  | 2.34 (1.63-3.34)     | 0.89 (0.83-0.95)     |
| <b>Signs with LR+&lt;2 or LR- &gt;0.5</b>                                         |               |        |                              |                              |                      |                      |
| Diarrhea                                                                          | 7             | 24 640 | 20% (12%-30%)                | 78% (73%-83%)                | 0.91 (0.68-1.22)     | 1.03 (0.96-1.10)     |
| ED only                                                                           | 5 (-2)        | 19 258 | 19% (9-35%)                  | 77% (70-83%)                 | 0.83 (0.51-1.33)     | 1.05 (0.95-1.16)     |
| UTI symptoms                                                                      | 4 (-3)        | 8169   | 15% (8-27%)                  | 80% (74-85%)                 | 0.77 (0.53-1.12)     | 1.06 (1.00-1.12)     |
| No UTI symptoms                                                                   | 3 (-4)        | 16 471 | 25% (13-44%)                 | 76% (69-83%)                 | 1.07 (0.71-1.60)     | 0.98 (0.85-1.13)     |
| Age <5y                                                                           | 6 (-1)        | 23 500 | 22% (14-33%)                 | 77% (72-81%)                 | 0.96 (0.72-1.27)     | 1.01 (0.94-1.10)     |
| Vomiting                                                                          | 7             | 10 505 | 27% (19%-38%)                | 69% (61%-76%)                | 0.89 (0.74-1.06)     | 1.05 (1.00-1.12)     |
| ED only                                                                           | 4 (-3)        | 3457   | 27% (20-37%)                 | 72% (63-79%)                 | 0.97 (0.85-1.10)     | 1.01 (0.96-1.07)     |
| UTI symptoms                                                                      | 4 (-3)        | 8169   | 27% (21-34%)                 | 68% (63-73%)                 | 0.85 (0.69-1.05)     | 1.07 (0.98-1.16)     |
| No UTI symptoms                                                                   | 3 (-4)        | 2336   | 28% (12-51%)                 | 70% (53-83%)                 | 0.93 (0.70-1.24)     | 1.03 (0.93-1.14)     |
| Age <5y                                                                           | 6 (-1)        | 9365   | 27% (17-38%)                 | 70% (52-78%)                 | 0.89 (0.72-1.09)     | 1.05 (0.98-1.12)     |
| Abdominal pain                                                                    | 6             | 5397   | 29% (14%-51%)                | 84% (64%-94%)                | 1.86 (0.82-4.22)     | 0.84 (0.67-1.07)     |
| ED only                                                                           | 3 (-3)        | 1771   | 25% (15-39)                  | 81% (49-95%)                 | 1.32 (0.47-3.72)     | 0.92 (0.72-1.78)     |
| UTI symptoms                                                                      | 3 (-3)        | 4211   | 47% (19-77%)                 | 65% (57-73%)                 | 1.36 (0.67-2.77)     | 0.81 (0.44-1.50)     |
| No UTI symptoms                                                                   | 3 (-3)        | 1186   | 16% (11-22%)                 | 94% (80-98%)                 | 2.61 (0.67-10.17)    | 0.90 (0.81-1.00)     |
| Age <5y                                                                           | 4 (-2)        | 3602   | 37% (14%-67%)                | 88% (62%-97%)                | 3.18 (0.21-6.14)     | 0.71 (0.47-0.96)     |
| RS                                                                                | 5 (-1)        | 4742   | 34% (15-58%)                 | 78% (58-89%)                 | 1.49 (0.68-3.25)     | 0.86 (0.62-1.20)     |
| No cough                                                                          | 4             | 20 946 | 81% (33%-97%)                | 32% (7%-76%)                 | 1.19 (0.93-1.52)     | 0.61 (0.34-1.07)     |
| No UTI symptoms                                                                   | 3 (-1)        | 18 206 | 56% (41-70%)                 | 59% (47-70%)                 | 1.36 (1.10-1.70)     | 0.75 (0.58-0.96)     |
| Age <5y                                                                           | 3 (-1)        | 20 207 | 88% (38-99%)                 | 21% (3-72%)                  | 1.12 (0.90-1.39)     | 0.55 (0.25-1.19)     |
| RS                                                                                | 3 (-1)        | 20 207 | 88% (38-99%)                 | 21% (3-72%)                  | 1.12 (0.90-1.39)     | 0.55 (0.25-1.19)     |

|                      |         |        |                |               |                  |                   |
|----------------------|---------|--------|----------------|---------------|------------------|-------------------|
| Irritability         | 5       | 5395   | 15% (4%-48%)   | 85% (63%-95%) | 1.00 (0.67-1.48) | 1.00 (0.93-1.07)  |
| Age <5y              | 4 (-1)  | 4667   | 14% (2%-56%)   | 85% (56%-96%) | 0.97 (0.49-1.45) | 1.01 (0.93-1.08)  |
| RS                   | 4 (-1)  | 4667   | 9% (3-21%)     | 91% (81-96%)  | 0.91 (0.55-1.48) | 1.01 (0.97-1.06)  |
| Abnormal appearance  | 4       | 26 525 | 36% (17%-60%)  | 70% (50%-85%) | 1.21 (1.02-1.44) | 0.91 (0.80-1.04)  |
| ED only              | 3 (-1)  | 21 533 | 33% (12-65%)   | 70% (43-88%)  | 1.11 (0.98-1.26) | 0.95 (0.86-1.06)  |
| Female gender        | 15      | 47 351 | 66% (57%-74%)  | 47% (42%-52%) | 1.24 (1.11-1.39) | 0.73 (0.58-0.91)  |
| ED only              | 9 (-6)  | 39 042 | 62% (48-75%)   | 47% (41-54%)  | 1.18 (0.99-1.40) | 0.80 (0.60-1.08)  |
| other settings only  | 4 (-11) | 2536   | 72% (59-83%)   | 47% (37-57%)  | 1.37 (1.20-1.56) | 0.59 (0.43-0.81)  |
| UTI symptoms         | 9 (-6)  | 13 436 | 65% (54-74%)   | 47% (41-53%)  | 1.22 (1.04-1.42) | 0.76 (0.58 (0.98) |
| No UTI symptoms      | 6 (-9)  | 6424   | 70% (50-85%)   | 47% (40-54%)  | 1.32 (1.12-1.55) | 0.64 (0.40-0.02)  |
| Age <5y              | 12 (-2) | 43 772 | 66% (64-76%)   | 45% (40-50%)  | 1.19 (1.05-1.35) | 0.77 (0.59-1.00)  |
| RS                   | 13 (-2) | 31 624 | 66% (55-75%)   | 46% (41-51%)  | 1.21 (1.07-1.36) | 0.75 (0.59-0.96)  |
| Caucasian            | 10      | 42 456 | 50% (34%-65%)  | 58% (42%-73%) | 1.18 (0.96-1.46) | 0.87 (0.73-1.04)  |
| ED only              | 8 (-2)  | 35 824 | 56% (37% -74%) | 52% (33-70%)  | 1.16 (0.93-1.44) | 0.85 (0.66-1.09)  |
| UTI symptoms         | 8 (-2)  | 39 786 | 50% (32-67%)   | 55% (37-72%)  | 1.10 (0.88-1.38) | 0.92 (0.75-1.13)  |
| Age <5y              | 9 (-1)  | 27 486 | 53% (35-71%)   | 57% (37-74%)  | 1.23 (0.95-1.59) | 0.82 (0.66-1.03)  |
| RS                   | 9 (-1)  | 27 486 | 63% (35-71%)   | 57% (37-74%)  | 1.23 (0.96-1.59) | 0.82 (0.66-1.03)  |
| Hispanic ethnicity   | 7       | 34 074 | 12% (4%-32%)   | 89% (76%-95%) | 1.03 (0.74-1.44) | 1.00 (0.95-1.05)  |
| ED only              | 6 (-1)  | 32 408 | 13% (3-38%)    | 88% (72-95%)  | 1.06 (0.74-1.51) | 0.99 (0.93-1.05)  |
| UTI symptoms         | 6 (-1)  | 32 408 | 13% (3-38%)    | 88% (72-95%)  | 1.06 (0.74-1.51) | 0.99 (0.93-1.05)  |
| Age <5y              | 6 (-1)  | 19 103 | 11% (3-35%)    | 89% (74-96%)  | 1.01 (0.68-1.51) | 1.00 (0.95-1.05)  |
| RS                   | 6 (-1)  | 19 103 | 11% (3-35%)    | 89% (74-96%)  | 1.01 (0.68-1.51) | 1.00 (0.95-1.05)  |
| Asian race           | 5       | 24 623 | 5% (4%-7%)     | 96% (95%-97%) | 1.42 (1.09-1.86) | 0.98 (0.97-1.00)  |
| ED only              | 3 (-2)  | 17 990 | 7% (5-9%)      | 97% (95-98%)  | 2.02 (1.19-3.41) | 0.97 (0.94-0.99)  |
| UTI symptoms         | 4 (-1)  | 22 957 | 5% (4-7%)      | 96% (95-97%)  | 1.44 (1.07-1.93) | 0.98 (0.97-1.00)  |
| Age <5y              | 4 (-1)  | 9652   | 5% (4-7%)      | 97% (96-98%)  | 1.45 (1.01-2.06) | 0.98 (0.97-1.00)  |
| RS                   | 4 (-1)  | 9652   | 5% (4-7%)      | 97% (96-98%)  | 1.45 (1.01-2.06) | 0.98 (0.97-1.00)  |
| Non-African American | 10      | 42 397 | 85% (76%-91%)  | 27% (14%-45%) | 1.17 (1.02-1.33) | 0.55 (0.48-0.63)  |
| ED only              | 8 (-2)  | 35 764 | 88% (79-93%)   | 22% (10-40%)  | 1.12 (1.00-1.26) | 0.56 (0.47-0.68)  |
| UTI symptoms         | 8 (-2)  | 39 786 | 86% (75-93%)   | 26% (12-48%)  | 1.16-0.99-1.36)  | 0.54 (0.46-0.65)  |
| Age <5y              | 9 (-1)  | 27 426 | 84% (74-91%)   | 29% (15-49%)  | 1.18-1.01-1.38)  | 0.55 (0.48-0.64)  |
| RS                   | 9 (-1)  | 27 426 | 84% (74-91%)   | 29% (15-49%)  | 1.18-1.01-1.38)  | 0.55 (0.48-0.64)  |

Bivariate random effects model by Chu and Cole et al. (2006); UTI= urinary tract infection; No. = Number; n= sample size; LR+ = positive likelihood ratio; LR-= negative likelihood ratio; y=years; ED only= analysis of studies performed at the emergency department; other settings only= analysis of studies performed at outpatient settings, other than the ED; UTI symptoms= analysis of studies that included children with UTI symptoms; no UTI symptoms= analysis of studies that included children with fever or acute illness episode, regardless of UTI symptoms; RS= analysis of studies with suboptimal reference standard test not included; 95%CI = 95% confidence intervals

\*Meta-analysis not possible if <3 studies available per subgroup



**Supplemental Table 1. Characteristics of Included Studies**

| Study                                      | Setting, Country | Design                  | Age range, (median/mean <sup>a</sup> )<br>No. girls (%) | Prevalence <sup>b</sup> (%) | Inclusion criteria                        | Reference standard                                                                                                                        |
|--------------------------------------------|------------------|-------------------------|---------------------------------------------------------|-----------------------------|-------------------------------------------|-------------------------------------------------------------------------------------------------------------------------------------------|
| <b>Bonadio et al. 1991</b> <sup>44</sup>   | ED<br>USA        | Retrospective, cons     | 1-2m (NR)<br>NR                                         | 16/683<br>(2.3%)            | Fever (>38°C)                             | Urine culture single pathogen ≥ 10 <sup>5</sup> cfu/ml (NR)                                                                               |
| <b>Bulloch et al. 2000</b> <sup>23</sup>   | ED<br>USA        | Prospective, conv, cx   | 1m-19y (5.8y)<br>122/159 (77%)                          | 29/159<br>(18.2%)           | Specimen available                        | Urine culture ≥10 <sup>4</sup> cfu/ml (UC, ≥10 <sup>5</sup> cfu/ml (MS,UC)                                                                |
| <b>Craig et al. 2010</b> <sup>43</sup>     | ED<br>Australia  | Prospective, cons, cx   | <5y (NR)<br>8814/15 781 (56%)                           | 543/15<br>781(3.4%)         | Fever (≥38.0°C) or 'felt hot'             | Urine culture any cfu/ml(SPA), ≥10 <sup>4</sup> cfu/ml (UC), ≥10 <sup>5</sup> cfu/ml (MS)                                                 |
| <b>Chaudhari et al. 2017</b> <sup>47</sup> | ED<br>USA        | Retrospective, cx       | <13y (1.5y)<br>NR (60%)                                 | 1150/14<br>971(7.7%)        | Test results available                    | Urine culture single pathogen ≥5x10 <sup>4</sup> cfu/ml (UC), ≥5x10 <sup>4</sup> cfu/ml (boys) (MS), ≥10 <sup>5</sup> cfu/ml (girls) (MS) |
| <b>Chaudhari et al. 2018</b> <sup>24</sup> | ED<br>USA        | Retrospective, cons, cx | <2y (6.1m)<br>1542/2554 (60%)                           | 494/2554<br>(19.3%)         | Test results available                    | Urine culture single pathogen ≥5x10 <sup>4</sup> cfu/ml (UC)                                                                              |
| <b>Chen et al. 2006</b> <sup>25</sup>      | ED<br>USA        | Retrospective           | 1m-2y (NR)<br>NR (57%)                                  | 64/465<br>(13.8%)           | Fever (>37.9°C) and specimen available    | Urine culture ≥10 <sup>3</sup> cfu/ml (SPA), ≥10 <sup>4</sup> cfu/ml (UC), ≥10 <sup>5</sup> cfu/ml (BS)                                   |
| <b>De et al. 2013</b> <sup>53</sup>        | ED<br>Australia  | Prospective, cons, cx   | <5y (NR)<br>NR                                          | 362/3653<br>(9.9%)          | Fever (≥38.0°C) or 'felt hot'             | Urine culture any cfu/ml (SPA), ≥10 <sup>4</sup> cfu/ml (UC), ≥10 <sup>5</sup> cfu/ml (CC, MS)                                            |
| <b>Diaz et al. 2016</b> <sup>52</sup>      | ED<br>Spain      | Retrospective           | <3m (43.4d)<br>128/318 (40%)                            | 76/318<br>(23.9%)           | Fever (≥38°C) and tests results available | Urine culture ≥5x10 <sup>4</sup> cfu/ml (SPA, UC)                                                                                         |

|                                            |                 |                           |                                                                |                                                  |                                                                                |                                                                                                                                                                                                              |
|--------------------------------------------|-----------------|---------------------------|----------------------------------------------------------------|--------------------------------------------------|--------------------------------------------------------------------------------|--------------------------------------------------------------------------------------------------------------------------------------------------------------------------------------------------------------|
| <b>Dickinson et al. 1979</b> <sup>48</sup> | FP<br>UK        | Prosp,<br>cx              | <15y (NR)<br>NR (67%)                                          | 14/156<br>(9.0%)                                 | Symptoms of UTI                                                                | Urine culture single pathogen $\geq 10^5$ cfu/ml in three consecutive specimens (MS, BS)                                                                                                                     |
| <b>Dobbs et al. 1987</b> <sup>26</sup>     | HC<br>UK        | Prosp,<br>cx              | 0-14y (NR)<br>NR                                               | 16/75<br>(21.3%)                                 | Symptoms of UTI                                                                | Urine culture $\geq 10^5$ cfu/ml, $\geq 10^4$ to $10^5$ cfu/ml and $\geq 10^2$ wbc/mm <sup>3</sup> (MS)                                                                                                      |
| <b>Duong et al. 2016</b> <sup>49</sup>     | ED<br>Belgium   | Prosp,<br>cons, cx        | $\leq 16$ y (44m)<br>739/1247 (59%)                            | 221/1247<br>(17.7%)                              | Specimen available                                                             | Urine culture single pathogen Any cfu/ml (SPA), $\geq 10^5$ cfu/ml (CC, UC)                                                                                                                                  |
| <b>Felt et al. 2017</b> <sup>27</sup>      | ED,<br>USA      | Prosp,<br>conv, cx        | <3y (9m)<br>139/193<br>(72%)                                   | 15/193<br>(7.8%)                                 | Fever ( $\geq 38^\circ\text{C}$ ) and specimen available                       | Urine culture any cfu/ml (UC or SPA)                                                                                                                                                                         |
| <b>Festo et al. 2011</b> <sup>28</sup>     | HC,<br>Tanzania | Prosp,<br>cons, cx        | 2m-5y (18m)<br>176/370<br>(48%)                                | 147/370<br>(39.7%)                               | Fever                                                                          | Urine culture any cfu/ml (SPA), $\geq 10^5$ cfu/ml (MS)                                                                                                                                                      |
| <b>Gauthier et al. 2012</b> <sup>46</sup>  | ED<br>Canada    | Prosp,<br>cons, cx        | 1m-3y (12m)<br>189/331<br>(57%)                                | 51/331<br>(15.4%)                                | Symptoms of UTI:<br>FWS ( $>38.5^\circ\text{C}$ ),<br>irritability or vomiting | Urine culture any cfu/ml of gram negative species (SPA), $\geq 10^4$ cfu/ml gram positive species (SPA), $\geq 10^5$ cfu/ml (UC), $\geq 10^4$ cfu/ml pseudomonas species (UC), $\geq 10^5$ cfu/ml (CC or MS) |
| <b>Gorelick et al. 2000</b> <sup>50</sup>  | ED<br>USA       | Prosp,<br>cons, cx<br>der | <2y (11 m) <sup>a</sup><br>1469/1469 (100%)                    | 63/1469<br>(4.3%)                                | FWS ( $\geq 38.3^\circ\text{C}$ ) in girls                                     | Urine culture single specimen $\geq 10^4$ cfu/ml (UC)                                                                                                                                                        |
| <b>Gorelick et al. 2003</b> <sup>51</sup>  | ED<br>USA       | Retrospective,<br>ncc     | 1m-2y (9.4m) <sup>a</sup><br>212/212<br>(100%)                 | 98/212<br>(46.2%)                                | Test results available                                                         | Urine culture pathogen $\geq 5 \times 10^4$ cfu/ml (UC)                                                                                                                                                      |
| <b>Hay et al. 2016</b> <sup>15</sup>       | FP,ED,WC<br>UK  | Prosp,<br>cons, cx        | <5y<br>(CC: 94% >2y)<br>(NP: 82% <2y)<br>CC:1473/2740<br>(54%) | CC:60/2740<br>(2.2%)<br>NP:30/227<br>7<br>(1.3%) | $\geq 1$ symptoms of UTI<br>(NICE-2)                                           | Urine culture single pathogen $\geq 10^5$ cfu/ml (NP, CC, BS), or pathogen $\geq 10^5$ cfu/ml with 1000-fold difference between the growth of this and the next species (NP, CC, BS)                         |

|                                          |                    |                    |                                                     |                     |                                                                                                             |                                                                                                                                  |
|------------------------------------------|--------------------|--------------------|-----------------------------------------------------|---------------------|-------------------------------------------------------------------------------------------------------------|----------------------------------------------------------------------------------------------------------------------------------|
|                                          |                    |                    | NP:1094/2277<br>(48%)                               |                     |                                                                                                             |                                                                                                                                  |
| <b>Hoberman et al. 1993<sup>29</sup></b> | ED<br>USA          | Prosp,<br>cons, cx | ≤1y (68% >2m)<br>419/945<br>(44%)                   | 50/945<br>(5.3%)    | Fever (≥38.3°C)                                                                                             | Urine culture ≥10 <sup>4</sup> cfu/ml (UC)                                                                                       |
| <b>Kanegaye et al. 2014<sup>30</sup></b> | ED<br>USA          | Prosp,<br>conv, cx | ≤4y (8.1m)<br>202/342<br>(59%)                      | 42/342<br>(12.3%)   | Fever (≥38°C) and test<br>results available                                                                 | Urine culture ≥5x10 <sup>4</sup> cfu/ml (UC)                                                                                     |
| <b>Kartika et al. 2006<sup>31</sup></b>  | ED,OD<br>Indonesia | Prosp,<br>cx       | 2m-14y (5.6y)<br>118/342<br>(58%)                   | 82/205<br>(40.0%)   | Suspicion of UTI                                                                                            | Urine culture single pathogen (CC, MS)                                                                                           |
| <b>Lagos et al. 1994<sup>32</sup></b>    | ED<br>Chile        | Prosp,<br>cx       | <15y<br>(26% <2y)<br>(59% <5y)<br>737/990<br>(74%)  | 348/990<br>(35.2%)  | Suspicion of UTI                                                                                            | Urine culture ≥10 <sup>5</sup> cfu/ml and ≥10wbc/mm <sup>3</sup><br>(SPA, MS or BS) or 2 positive cultures<br>obtained within 5d |
| <b>Lizama et al. 2005<sup>33</sup></b>   | ED<br>Chile        | Retrosop,<br>cons  | 11d-14y (2.3y)<br>739/1140<br>(65%)                 | 246/1140<br>(21.6%) | Specimen available                                                                                          | Urine culture any cfu/ml (SPA) ≥10 <sup>4</sup> cfu/ml<br>(UC), ≥10 <sup>5</sup> cfu/ml (MS)                                     |
| <b>Mitiku et al. 2018<sup>34</sup></b>   | OD<br>Ethiopia     | Prosp,<br>cons, cx | <15y<br>(20.5%<1y)<br>(60% <5y)<br>103/269<br>(38%) | 74/269<br>(27.5%)   | Symptoms of UTI:<br>≥1: t°≥37.5°C, vomiting,<br>dysuria, frequency,<br>urgency, loin pain,<br>darker change | Urine culture ≥10 <sup>5</sup> cfu/ml (MS)                                                                                       |
| <b>Msaki et al. 2012<sup>35</sup></b>    | HC<br>Tanzania     | Prosp,<br>cons, cx | 2m-5y (15m)<br>126/231<br>(55%)                     | 47/231<br>20.3%     | Fever (≥37.5°C)                                                                                             | Urine culture any cfu/ml (SPA), ≥10 <sup>5</sup> cfu/ml<br>(MS)                                                                  |

|                                              |               |                      |                                                                            |                                                         |                                                                                                                         |                                                                                                                       |
|----------------------------------------------|---------------|----------------------|----------------------------------------------------------------------------|---------------------------------------------------------|-------------------------------------------------------------------------------------------------------------------------|-----------------------------------------------------------------------------------------------------------------------|
| <b>Musa-Aisien et al. 2003</b> <sup>36</sup> | ED<br>Nigeria | Prosp,<br>cons, cx   | 1m-5y (18m)<br>123/300<br>(41%)                                            | 26/300<br>(8.7%)                                        | Fever ( $\geq 38^{\circ}\text{C}$ )                                                                                     | Urine culture $\geq 10^5$ cfu/ml (SPA, CC or MS)                                                                      |
| <b>Newman et al. 2002</b> <sup>37</sup>      | PO<br>USA     | Prosp,<br>cx         | $\leq 3\text{m}$<br>(32% <1m)<br>(75% <2m)<br>798/1666<br>(48%)            | 161/1666<br>9.7%                                        | Fever ( $\geq 38^{\circ}\text{C}$ )                                                                                     | Urine culture single pathogen $\geq 10^2$ cfu/ml (SPA), $\geq 2 \times 10^4$ cfu/ml (UC), $\geq 10^5$ cfu/ml (BS, CC) |
| <b>O'Brien et al. 2013</b> <sup>4</sup>      | FP<br>UK      | Prosp,<br>cons, cx   | $\leq 5\text{y}$ (2.3y)<br>284/597<br>(48%)                                | 35/597<br>(5.9%)                                        | Illness episode <28d                                                                                                    | Urine culture $\geq 10^5$ cfu/ml (NP, CC)                                                                             |
| <b>Pylkkanen et al. 1979</b> <sup>38</sup>   | OD<br>Finland | Prosp,<br>cx         | <18y (64.5% $\leq 2\text{y}$ )<br>NR                                       | 127/200<br>(63.5%)                                      | Suspicion of UTI                                                                                                        | Urine culture any cfu/ml (Uricult and blood agar plate; SPA)                                                          |
| <b>Shaikh et al. 2018</b> <sup>16</sup>      | ED<br>USA     | Retrosp,<br>ncc      | 2m-2y<br>(72.9% <1y)<br>der: 1216/1686<br>(72%)<br>val: 291/384<br>(76%)   | der:<br>542/1686<br>(32.2%)<br>val:<br>30/384<br>(7.8%) | Fever ( $\geq 38^{\circ}\text{C}$ ) and<br>specimen available<br>cases=positive culture<br>controls=negative<br>culture | Urine culture $\geq 5 \times 10^4$ cfu/ml (UC) and pyuria                                                             |
| <b>Shaikh et al. 2019</b> <sup>45</sup>      | ED<br>USA     | Retrosp,<br>cons, cx | <2y (7.0m)<br>6743/10 078 (67%)                                            | 617/10 078<br>(6.1%)                                    | Test results available                                                                                                  | Urine culture pathogen $\geq 5 \times 10^4$ cfu/ml (UC)                                                               |
| <b>Shaw et al. 1998</b> <sup>39</sup>        | ED<br>USA     | Prosp,<br>cons, cx   | boys <1y<br>(41.5% <6m)<br>girls <2y<br>(55.3% <12m)<br>1469/2411<br>(61%) | 80/2411<br>(3.3%)                                       | Fever ( $\geq 38.5^{\circ}\text{C}$ ) and<br>symptoms of UTI                                                            | Urine culture $\geq 10^4$ cfu/ml (UC)                                                                                 |

|                                             |                      |                    |                                                   |                     |                                             |                                                                                                                                   |
|---------------------------------------------|----------------------|--------------------|---------------------------------------------------|---------------------|---------------------------------------------|-----------------------------------------------------------------------------------------------------------------------------------|
| <b>Tzimenatos et al. 2018</b> <sup>40</sup> | ED<br>USA            | Prosp,<br>conv, cx | <60d<br>(31.3%<28d)<br>1771/4147<br>(43%)         | 289/4147<br>(7.0%)  | Fever (>38°C) and test<br>results available | Urine culture pathogen ≥10 <sup>3</sup> cfu/ml (SPA),<br>≥5x10 <sup>4</sup> cfu/ml (UC)                                           |
| <b>Velasco et al. 2015</b> <sup>17</sup>    | ED<br>Spain          | Prosp,<br>cons, cx | <90d (46d)<br>1372/3401<br>(40%)                  | 547/3401<br>(16.1%) | Fever (≥38°C) and test<br>results available | Urine culture single pathogen ≥5x10 <sup>4</sup> cfu/ml<br>(SPA, UC)                                                              |
| <b>Verbakel et al. 2015</b> <sup>41</sup>   | FP, ED,OD<br>Belgium | Prosp,<br>cons, cx | 1m-16y (2.0y)<br>362/756<br>(48%)                 | 87/756<br>(11.5%)   | Illness episode ≤5d                         | Urine culture ≥10 <sup>5</sup> cfu/ml (NR)                                                                                        |
| <b>Zorc et al. 2005</b> <sup>42</sup>       | ED<br>USA            | Prosp,<br>cx       | ≤60d<br>(35.5d) <sup>a</sup><br>439/1005<br>(44%) | 91/1005<br>(9.1%)   | Fever (≥38°C)                               | Urine culture ≥10 <sup>3</sup> cfu/ml(SPA), ≥5x10 <sup>4</sup> cfu/ml<br>(UC), ≥10 <sup>4</sup> cfu/ml + positive urinalysis (UC) |

UTI= urinary tract infection; USA= United States; UK= United Kingdom; ED= Emergency departments; FP= family practices; OD= outpatient department of a hospital; HC= health centers; PO= pediatricians' offices; Prosp= Prospective design; retrosp= Retrospective design; cx= Cross-sectional design; cons= Consecutive enrolment; conv= convenience sampling; ncc= nested case-control; y= years; d= days; m= months; °C= degrees Celsius; FWS = fever without a source for infection; CRP= C-reactive protein; WBC= white blood cell (in urine); UC= urethral catheterization; SPA=suprapubic aspiration; MS=midstream sample; CC= clean catch sample (first stream); BS=bag specimen; NP= nappy pad sample; NR= not reported; POC=point-of-care; hpf = high polarized field; cfu= colony forming unit; ml=milliliter

<sup>a</sup>mean (median not provided); <sup>b</sup>prevalence= No. of children with UTI/sample size

## REFERENCES

1. Butler CC, O'Brien K, Pickles T, et al; DUTY study team. Childhood urinary tract infection in primary care: a prospective observational study of prevalence, diagnosis, treatment, and recovery. *Br J Gen Pract.* 2015;65(633):e217-e223.
2. Whiting P, Westwood M, Bojke L, et al. Clinical effectiveness and cost-effectiveness of tests for the diagnosis and investigation of urinary tract infection in children: a systematic review and economic model. *Health Technol Assess.* 2006;10(36):iii-iv, xi-xiii, 1-154.
3. Coulthard MG, Vernon SJ, Lambert HJ, Matthews JN. A nurse led education and direct access service for the management of urinary tract infections in children: prospective controlled trial. *BMJ.* 2003;327(7416):656.
4. O'Brien K, Edwards A, Hood K, Butler CC. Prevalence of urinary tract infection in acutely unwell children in general practice: a prospective study with systematic urine sampling. *Br J Gen Pract.* 2013;63(607):e156-e164.
5. Shaikh N, Ewing AL, Bhatnagar S, Hoberman A. Risk of renal scarring in children with a first urinary tract infection: a systematic review. *Pediatrics.* 2010;126(6):1084-1091.
6. Roberts KB. Revised AAP guideline on UTI in febrile infants and young children. *Am Fam Physician.* 2012;86(10):940-946.
7. Stein R, Dogan HS, Hoebcke P, et al; European Association of Urology; European Society for Pediatric Urology. Urinary tract infections in children: EAU/ESPU guidelines. *Eur Urol.* 2015;67(3):546-558.
8. National Institute for health and Care Excellence (NICE). CG54 Urinary tract infection in under 16s: diagnosis and management. Published Aug 2007. Updated Oct 2018. Accessed Jan 2020. <https://www.nice.org.uk/guidance/cg54>
9. Leung AKC, Wong AHC, Leung AAM, Hon KL. Urinary tract infection in children. *Recent Pat Inflamm Allergy Drug Discov.* 2019;13(1):2-18.
10. Kaufman J, Temple-Smith M, Sanci L. Urinary tract infections in children: an overview of diagnosis and management. *BMJ Paediatr Open.* 2019;3(1):e000487.
11. Shah L, Mandlik N, Kumar P, Andaya S, Patamasucon P. Adherence to AAP practice guidelines for urinary tract infections at our teaching institution. *Clin Pediatr (Phila).* 2008;47(9):861-864.
12. Shaikh N, Morone NE, Lopez J, et al. Does this child have a urinary tract infection? *JAMA.* 2007;298(24):2895-2904.
13. Obuchowski NA. Sample size calculations in studies of test accuracy. *Stat Methods Med Res.* 1998;7(4):371-392.
14. Knottnerus JA, Buntinx F. *The Evidence Base of Clinical Diagnosis: Theory and Methods of Diagnostic Research.* Wiley-Blackwell; 2009.
15. Hay AD, Birnie K, Busby J, et al. The Diagnosis of Urinary Tract infection in Young children (DUTY): a diagnostic prospective observational study to derive and validate a clinical algorithm for the diagnosis of urinary tract infection in children presenting to primary care with an acute illness. *Health Technol Assess.* 2016;20(51):1-294.
16. Shaikh N, Hoberman A, Hum SW, et al. Development and validation of a calculator for estimating the probability of urinary tract infection in young febrile children. *JAMA Pediatr.* 2018;172(6):550-556.

17. Velasco R, Benito H, Mozun R, et al; Group for the Study of Febrile Infant of the RiSEUP-SPERG Network. Using a urine dipstick to identify a positive urine culture in young febrile infants is as effective as in older patients. *Acta Paediatr.* 2015;104(1):e39-e44.
18. Van den Bruel A, Haj-Hassan T, Thompson M, Buntinx F, Mant D; European Research Network on Recognising Serious Infection investigators. Diagnostic value of clinical features at presentation to identify serious infection in children in developed countries: a systematic review. *Lancet.* 2010;375(9717):834-845.
19. Jaeschke R, Guyatt GH, Sackett DL. Users' guides to the medical literature. III. How to use an article about a diagnostic test. B. What are the results and will they help me in caring for my patients? The Evidence-Based Medicine Working Group. *JAMA.* 1994;271(9):703-707.
20. Crewe S, Rowe PC. Research and statistics: likelihood ratio in diagnosis. *Pediatr Rev.* 2011;32(7):296-298.
21. Chu H, Cole SR. Bivariate meta-analysis of sensitivity and specificity with sparse data: a generalized linear mixed model approach. *J Clin Epidemiol.* 2006;59(12):1331-1332, author reply 1332-1333.
22. Steinhauser S, Schumacher M, Rücker G. Modelling multiple thresholds in meta-analysis of diagnostic test accuracy studies. *BMC Med Res Methodol.* 2016;16(1):97.
23. Bulloch B, Bausher JC, Pomerantz WJ, Connors JM, Mahabee-Gittens M, Dowd MD. Can urine clarity exclude the diagnosis of urinary tract infection? *Pediatrics.* 2000;106(5):E60.
24. Chaudhari PP, Monuteaux MC, Bachur RG. Microscopic bacteriuria detected by automated urinalysis for the diagnosis of urinary tract infection. *J Pediatr.* 2018;202:238-244.e1.
25. Chen L, Baker MD. Racial and ethnic differences in the rates of urinary tract infections in febrile infants in the emergency department. *Pediatr Emerg Care.* 2006;22(7):485-487.
26. Dobbs FF, Fleming DM. A simple scoring system for evaluating symptoms, history and urine dipstick testing in the diagnosis of urinary tract infection. *J R Coll Gen Pract.* 1987;37(296):100-104.
27. Felt JR, Yurkovich C, Garshott DM, et al. The utility of real-time quantitative polymerase chain reaction genotype detection in the diagnosis of urinary tract infections in children. *Clin Pediatr (Phila).* 2017;56(10):912-919.
28. Epaphura Festo BRK, Aldofina Hokororo, Stephen E. Mshana. Predictors of urinary tract infection among febrile children attending at Bugando Medical Centre Northwestern, Tanzania. *Arch Clin Microbiol.* 2011;2(5).
29. Hoberman A, Chao HP, Keller DM, Hickey R, Davis HW, Ellis D. Prevalence of urinary tract infection in febrile infants. *J Pediatr.* 1993;123(1):17-23.
30. Kanegaye JT, Jacob JM, Malicki D. Automated urinalysis and urine dipstick in the emergency evaluation of young febrile children. *Pediatrics.* 2014;134(3):523-529.
31. Kartika I, Damanik MP, Soenarto SY. Diagnostic test of urine clarity in urinary tract infection. *Paediatr Indones.* 2006;46(4):170-173.
32. Rossana Lagos Z, JCS, Patricio Herrera L. Utilidad de una tira reactiva y del aspecto macroscópico de la orina para descartar la sospecha clínica de infección del tracto urinario en niños ambulatorios. *Rev Chil Pediatr.* 1994;65(2):88-94.

33. Lizama C M, Luco I M, Reichhard T C, Hirsch B T. Infección del tracto urinario en un servicio de urgencia pediátrico: Frecuencia y características clínicas. *Rev Chilena Infectol.* 2005;22(3):235-241.
34. Mitiku E, Amsalu A, Tadesse BT. Pediatric urinary tract infection as a cause of outpatient clinic visits in southern Ethiopia: A Cross Sectional Study. *Ethiop J Health Sci.* 2018;28(2):187-196.
35. Msaki BP, Mshana SE, Hokororo A, Mazigo HD, Morona D. Prevalence and predictors of urinary tract infection and severe malaria among febrile children attending Makongoro health centre in Mwanza city, North-Western Tanzania. *Arch Public Health.* 2012;70(1):4.
36. Musa-Aisien AS, Ibadin OM, Ukoh G, Akpede GO. Prevalence and antimicrobial sensitivity pattern in urinary tract infection in febrile under-5s at a children's emergency unit in Nigeria. *Ann Trop Paediatr.* 2003;23(1):39-45.
37. Newman TB, Bernzweig JA, Takayama JI, Finch SA, Wasserman RC, Pantell RH. Urine testing and urinary tract infections in febrile infants seen in office settings: the Pediatric Research in Office Settings' Febrile Infant Study. *Arch Pediatr Adolesc Med.* 2002;156(1):44-54.
38. Pylkkänen J, Vilska J, Koskimies O. Diagnostic value of symptoms and clean-voided urine specimen in childhood urinary tract infection. *Acta Paediatr Scand.* 1979;68(3):341-344.
39. Shaw KN, Gorelick M, McGowan KL, Yakscoe NM, Schwartz JS. Prevalence of urinary tract infection in febrile young children in the emergency department. *Pediatrics.* 1998;102(2):e16.
40. Tzimenatos L, Mahajan P, Dayan PS, et al; Pediatric Emergency Care Applied Research Network (PECARN). Accuracy of the urinalysis for urinary tract infections in febrile infants 60 days and younger. *Pediatrics.* 2018;141(2):e20173068.
41. Verbakel JY, Lemiengre MB, De Burghgraeve T, et al. Should all acutely ill children in primary care be tested with point-of-care CRP: a cluster randomised trial. *BMC Med.* 2016;14(1):131.
42. Zorc JJ, Levine DA, Platt SL, et al; Multicenter RSV-SBI Study Group of the Pediatric Emergency Medicine Collaborative Research Committee of the American Academy of Pediatrics. Clinical and demographic factors associated with urinary tract infection in young febrile infants. *Pediatrics.* 2005;116(3):644-648.
43. Craig JC, Williams GJ, Jones M, et al. The accuracy of clinical symptoms and signs for the diagnosis of serious bacterial infection in young febrile children: prospective cohort study of 15 781 febrile illnesses. *BMJ.* 2010;340:c1594.
44. Bonadio WA, McElroy K, Jacoby PL, Smith D. Relationship of fever magnitude to rate of serious bacterial infections in infants aged 4-8 weeks. *Clin Pediatr (Phila).* 1991;30(8):478-480.
45. Shaikh N, Shope MF, Kurs-Lasky M. Urine specific gravity and the accuracy of urinalysis. *Pediatrics.* 2019;144(5):e20190467.
46. Gauthier M, Gouin S, Phan V, Gravel J. Association of malodorous urine with urinary tract infection in children aged 1 to 36 months. *Pediatrics.* 2012;129(5):885-890.
47. Chaudhari PP, Monuteaux MC, Shah P, Bachur RG. The importance of urine concentration on the diagnostic performance of the urinalysis for pediatric urinary tract infection. *Ann Emerg Med.* 2017;70(1):63-71.e8.
48. Dickinson JA. Incidence and outcome of symptomatic urinary tract infection in children. *Br Med J.* 1979;1(6174):1330-1332.



49. Duong HP, Wissing KM, Tram N, Mascart G, Lepage P, Ismaili K. Accuracy of automated flow cytometry-based leukocyte counts to rule out urinary tract infection in febrile children: a prospective cross-sectional study. *J Clin Microbiol*. 2016;54(12):2975-2981.
50. Gorelick MH, Shaw KN. Clinical decision rule to identify febrile young girls at risk for urinary tract infection. *Arch Pediatr Adolesc Med*. 2000;154(4):386-390.
51. Gorelick MH, Hoberman A, Kearney D, Wald E, Shaw KN. Validation of a decision rule identifying febrile young girls at high risk for urinary tract infection. *Pediatr Emerg Care*. 2003;19(3):162-164.
52. Díaz MG, García RP, Gamero DB, et al. Lack of accuracy of biomarkers and physical examination to detect bacterial infection in febrile infants. *Pediatr Emerg Care*. 2016;32(10):664-668.
53. De S, Williams GJ, Hayen A, et al. Accuracy of the “traffic light” clinical decision rule for serious bacterial infections in young children with fever: a retrospective cohort study. *BMJ*. 2013;346:f866.
54. Hay AD, Whiting P, Butler CC. How best to diagnose urinary tract infection in preschool children in primary care? *BMJ*. 2011;343. <https://doi.org/10.1136/bmj.d6316>
55. Zorc JJ, Kiddoo DA, Shaw KN. Diagnosis and management of pediatric urinary tract infections. *Clin Microbiol Rev*. 2005;18(2):417-422.

**Supplemental Figure 1. PRISMA flow diagram of included studies**

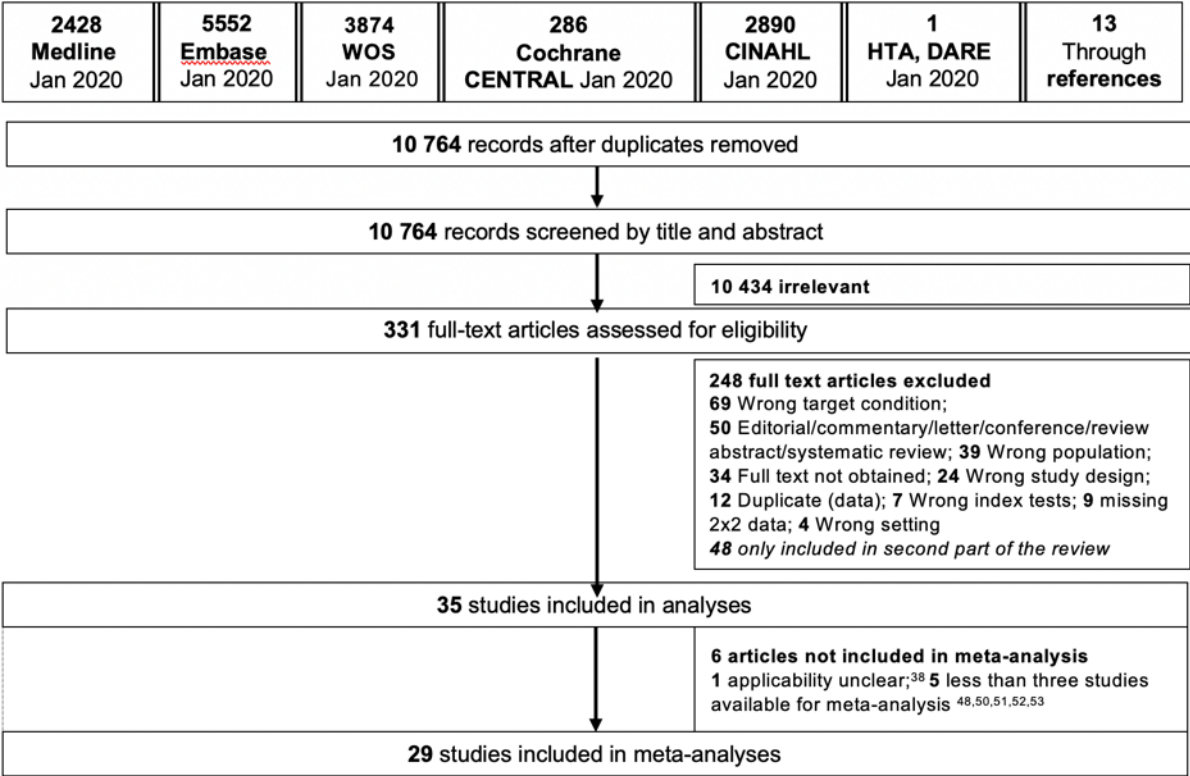

Legend: PRISMA = Preferred Reporting Items for a Systematic review and Meta-Analysis of Diagnostic Test Accuracy Studies; WOS = Web Of Science; HTA = Health Technology Assessments
